# Supplementary material
Source: Research Square preprint supplement (doi:10.21203/rs.3.rs-8968872/v1)
Supplement: Supplementary file 1 [file a852ac1f3f8e9ba3365d1241.docx]

**Supporting Information**

**Breaking the Performance Trade-off: Unprecedented Polymer Alloys with Heterogeneously Dispersed Nanodomains via Reactive Processing**

Author 1 1,2*, Author 2 1,2, Author 3 1,2, Author 4 3, Author 5 1,2*

*1 University A, 2 University B, 3 University C*

# Table of contents

| **Figure S1** | Chemical equation between ethylene acrylic ester-glycidyl methacrylate terpolymer (EGMA) and poly (L-lactide) (PLLA) during reactive processing: (a) Without catalyst: *In-situ* ring-opening reaction between epoxide groups of EGMA and terminal carboxyl groups of PLLA, (b) with the addition of N, N-dimethyl stearyl amide (DMSA): *In-situ* ring-opening reaction between epoxide groups of EGMA and terminal carboxyl/hydroxyl groups of PLLA |
| --- | --- |
| **Figure S2** | Statistical data of the diameter of EGMA droplets or nano-domains in of (a) conventional alloys (POM/EGMA 90/10, w/w), (b)-(d) m-EGMA incorporated alloys featuring “heterogeneously dispersed nano-domains (hDNs)” architecture with various composition ratio of POM/m-EGMA ranging from (b) 90/10, (c) 70/30, to (d) 50/50. The weight ratio of EGMA/PLLA was fixed as 10/20 with addition of 0.3wt% DMSA. More than 400 nano-domains were taken into statistical estimations. |
| **Figure S3** | SEM images of “heterogeneously dispersed nano-domains” (hDNs)-structured POM alloys with various composition ratio of POM/e-EGMA ranging from (a) 90/10, (b) 70/30, to (c) 50/50. The weight ratio of EGMA/PLLA was fixed as 10/20 with addition of 0.3wt% DMSA. |
| **Figure S4** | SEM images of conventional POM alloys featuring “sea-island” morphology: (a) POM/EGMA 70/30 (w/w) alloys and (b) POM/m-EGMA (0% DMSA) 70/30 alloys. Note that m-EGMA (0% DMSA) referred to the elastomer with weight ratio of 10/20 (EGMA/PLLA) without addition of catalyst. |
| **Figure S5** | TEM images of conventional POM alloys featuring “sea-island” morphology with various compositional ratio of POM/m-EGMA (0DMSA) ranging from (a) 90/10, (b) 70/30, to (d) 50/50. Note that m-EGMA (0% DMSA) referred to the elastomer with weight ratio of 10/20 (EGMA/PLLA) without addition of catalyst. |
| **Figure S6** | Digital photos and SEM images of representative specimen after the notched izod impact tests: (a) POM/EGMA 90/10 alloy, (b) POM/m-EGMA (0DMSA) 70/10 alloy demonstrating conventional droplet/matrix morphology, and (c) POM/m-EGMA 70/10 alloy featuring “heterogeneously dispersed nano-domains” (hDNs) microstructure. Note that the concentration of EGMA in the three POM alloys was fixed as 10 wt%. The weigh ratio of EGMA/PLLA was fixed as 10/20 in m-EGMA (0DMSA) and m-EGMA. |
| **Figure S7** | Linear rheological behaviors of POM, m-EGMA, and POM alloys featuring conventional droplet/matrix and “heterogeneously dispersed nano-domains” (hDNs) microstructure. (a) Storage modulus (*G'(ω)*), (b) Complex viscosity (*|η*(ω)|*) against angular frequency, and (c) Weighted relaxation spectrum estimated from SAOS experiments at 190 oC. |
| **Figure S8** | Representative criteria estimated from SAOS experiments: (a) van Gurp-Palmen plots, (b) Cole-Cole plots, (c) Han plots, and (d) plots on *|η*(ω)|* versus *|G*(ω)|* of POM, m-EGMA, and POM alloys featuring conventional droplet/matrix and “heterogeneously dispersed nano-domain” (hDNs) microstructure. |
| **Figure S9** | FT-IR spectrum of pristine POM, EGMA, and PLLA. |
| **Figure S10** | Torque evolution curves of m-EGMA without or with addition of catalyst (DMSA). The melt processing was conducted at 190 oC with a rotation speed of 50 r/min for 10 min. |
| **Figure S11** | FT-IR spectrum of m-EGMA (0.3DMSA) after selective extraction of free PLLA chains by chloroform using Soxhlet apparatus at 110 oC for 36 h. The weigh ratio of EGMA/PLLA was 10/20. |
| **Figure S12** | (a) TGA and (DTG) curves of EGMA, PLLA, and m-EGMA after selective extraction of free PLLA chains by chloroform. The weigh ratio of EGMA/PLLA in m-EGMA was fixed as 10/20 containing various concentration of DMSA from 0.3 wt%, 0.6 wt%, 1.2 wt%, to 2.4 wt%. |
| **Figure S13** | Schematic illustrations and TEM images of m-EGMA with or without addition of DMSA. The weigh ratio of EGMA/PLLA in m-EGMA was fixed as 10/20. |
| **Figure S14** | Representative stress-strain curves of POM and hDNs-structured POM/m-EGMA alloys. The weigh ratio of EGMA/PLLA in m-EGMA was fixed as 10/20 containing various concentration of DMSA from 0.3 wt%, 0.6 wt%, 1.2 wt%, to 2.4 wt%. |
| **Figure S15** | SEM images of POM/(EGMA/PLLA) 70/(10/20) alloys with different concentration of DMSA: (a) 0 wt%, (b) 0.3 wt%, (c) 0.6 wt%, (d) 1.2 wt%, and (e) 2.4 wt%. |
| **Figure S16** | TEM images of m-EGMA (EGMA/PLLA 10/20, 0.3 wt% DMSA) (a) before, and (b) after selective extraction of free PLLA chains by chloroform using Soxhlet apparatus at 110 oC for 36 h. |
| **Figure S17** | Notched impact strength of “heterogeneously dispersed nano-domains” (hDNs)-structured alloys incorporating various compositional ratio of PLLA in m-EGMA. The EGMA loadings in the obtained alloys was fixed as 10 wt%. The concentration of DMSA in m-EGMA was fixed as 0.3 wt%. |
| **Figure S18** | Representative stress-strain curves of “heterogeneously dispersed nano-domains” (hDNs)-structured alloys incorporating various compositional ratio of PLLA in m-EGMA. The EGMA loadings in the obtained alloys was fixed as 10 wt%. The concentration of DMSA in m-EGMA was fixed as 0.3 wt%. |
| **Figure S19** | SEM images of “heterogeneously dispersed nano-domains” (hDNs)-structured alloys incorporating various compositional ratio of PLLA in m-EGMA from (a) 89/(10/1), (b) 87/(10/3), (c) 85/(10/5), (d) 80/(10/10), (e) 75/(10/15), (f) 70/(10/20), (g) 65/(10/25), to (h) 60/(10/30). The concentration of DMSA in m-EGMA was fixed as 0.3 wt%. |
| **Figure S20** | Statistical data of the diameter of EGMA nano-domains in “heterogeneously dispersed nano-domains” (hDNs)-structured alloys incorporating various compositional ratio of PLLA in m-EGMA from (a) 89/(10/1), (b) 87/(10/3), (c) 85/(10/5), (d) 80/(10/10), (e) 75/(10/15), (f) 70/(10/20), (g) 65/(10/25), to (h) 60/(10/30). The concentration of DMSA in m-EGMA was fixed as 0.3 wt%. |
| **Figure S21** | Averaged diameter of EGMA nano-domains in “heterogeneously dispersed nano-domains” (hDNs)-structured alloys as a function of PLLA loadings in m-EGMA. |
| **Figure S22** | DSC thermograms of “heterogeneously dispersed nano-domains” (hDNs)-structured alloys incorporating various compositional ratio of PLLA in m-EGMA collected at (a) first heating, (b) cooling, and (c) second heating procedure with the heating/cooling rate of 10 oC/min. |
| **Figure S23** | SEM images of “heterogeneously dispersed nano-domains” (hDNs)-structured alloys as a function of EGMA loadings in m-EGMA, that is POM/(EGMA/PLLA) from (a) 70/(0/20), (b) 70/(5/20), (c) 70/(10/20), to (d) 70/(15/20). |
| **Figure S24** | SEM images of representative hDNs-structured alloy POM/(EGMA/PLLA) 70/(10/20) captured at different processing times at 190 oC with a rotation speed of 50 r/min: from (a) 0.5min, (b) 2 min, (c) 5 min, (d) 10 min, to (e) 20min. |
| **Table S1** | Mechanical parameters of POM, conventional POM/m-EGMA (0DMSA) alloys featuring droplet/matrix morphology and POM/m-EGMA (0.3DMSA) alloys featuring “heterogeneously dispersed nano-domains” microstructure. |
| **Table S2** | Performance comparison in terms of notched impact strength, elongation at break, and tensile strength of POM alloys. |
| **Table S3** | The content of EGMA and PLLA in m-EGMA containing various concentration of DMSA before and after selective extraction of free PLLA chains calculated from TGA measurements. |
| **Table S4** | Mechanical parameters of POM/(EGMA/PLLA) 70/(10/20) alloys with different concentration of DMSA: (a) 0 wt%, (b) 0.3 wt%, (c) 0.6 wt%, (d) 1.2 wt%, and (e) 2.4 wt%. |
| **Table S5** | Mechanical parameters of “heterogeneously dispersed nano-domains” (hNDs)-structured alloys incorporating various compositional ratio of PLLA in m-EGMA from. The concentration of DMSA in m-EGMA was fixed as 0.3 wt%. |
| **Table S6** | Mechanical parameters of “heterogeneously dispersed nano-domains” (hNDs)-structured alloys as a function of EGMA loadings in m-EGMA. |


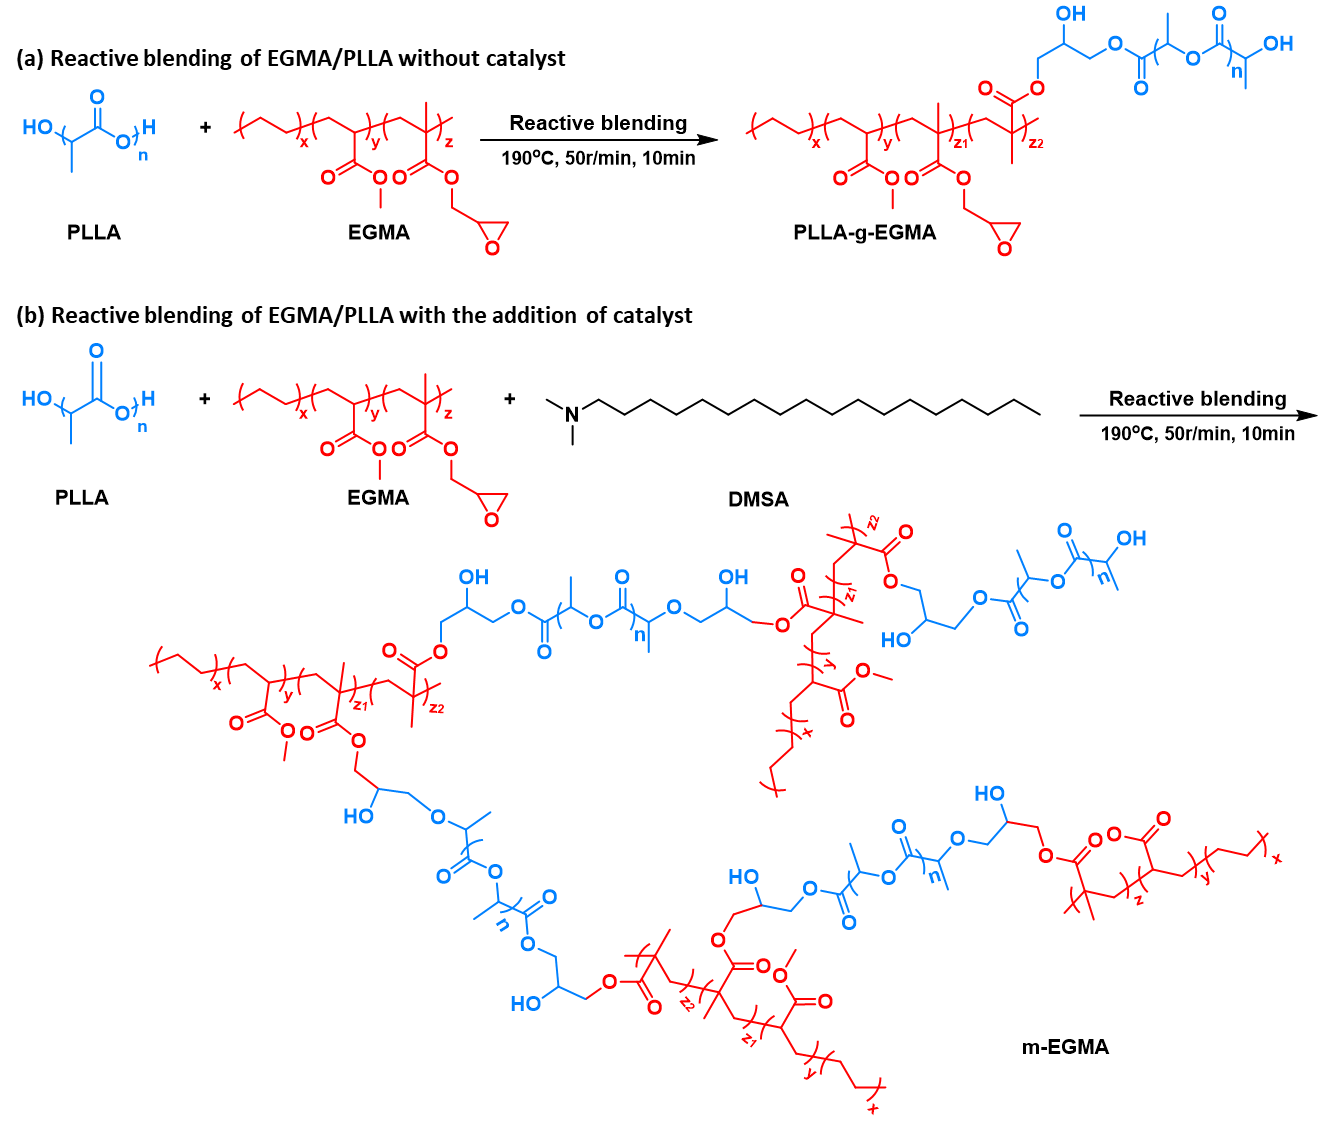


# **Figure S1**. Chemical equation between ethylene acrylic ester-glycidyl methacrylate terpolymer (EGMA) and poly (L-lactide) (PLLA) during reactive processing: (a) Without catalyst: *In-situ* ring-opening reaction between epoxide groups of EGMA and terminal carboxyl groups of PLLA, (b) with the addition of N, N-dimethyl stearyl amide (DMSA): *In-situ* ring-opening reaction between epoxide groups of EGMA and terminal carboxyl/hydroxyl groups of PLLA.


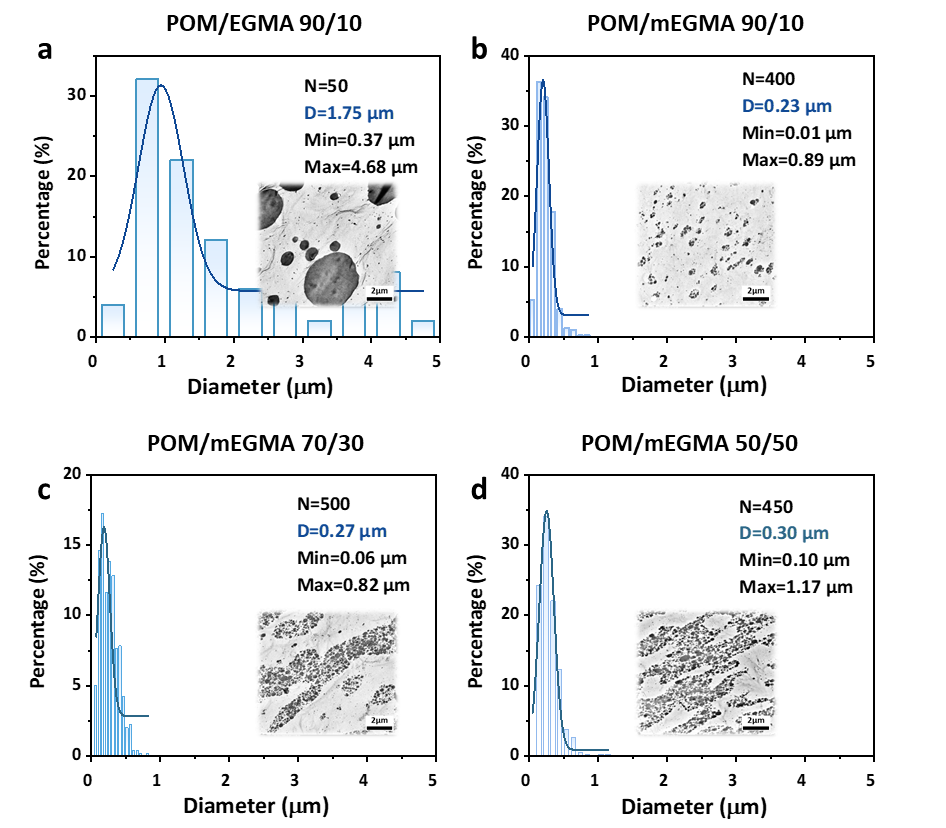


# **Figure S2**. Statistical data of the diameter of EGMA droplets or nano-domains in of (a) conventional alloys (POM/EGMA 90/10, w/w), (b)-(d) m-EGMA incorporated alloys featuring “heterogeneously dispersed nano-domains” (hDNs) architecture with various composition ratio of POM/m-EGMA ranging from (b) 90/10, (c) 70/30, to (d) 50/50. The weight ratio of EGMA/PLLA was fixed as 10/20 with addition of 0.3wt% DMSA. More than 400 nano-domains were taken into statistical estimations.


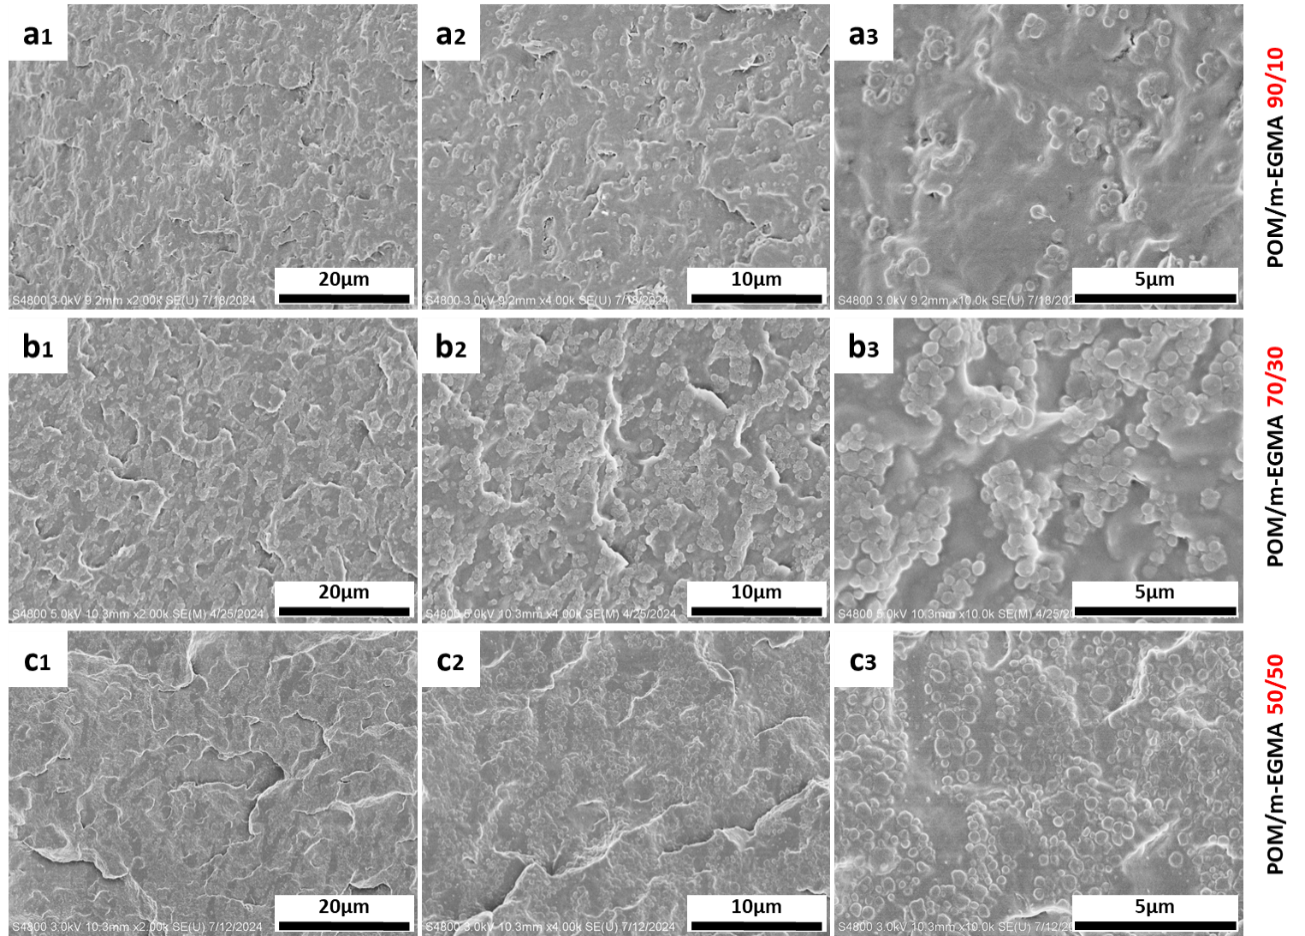


# **Figure S3**. SEM images of “heterogeneously dispersed nano-domains” (hDNs)-structured POM alloys with various composition ratio of POM/e-EGMA ranging from (a) 90/10, (b) 70/30, to (c) 50/50. The weight ratio of EGMA/PLLA was fixed as 10/20 with addition of 0.3wt% DMSA.


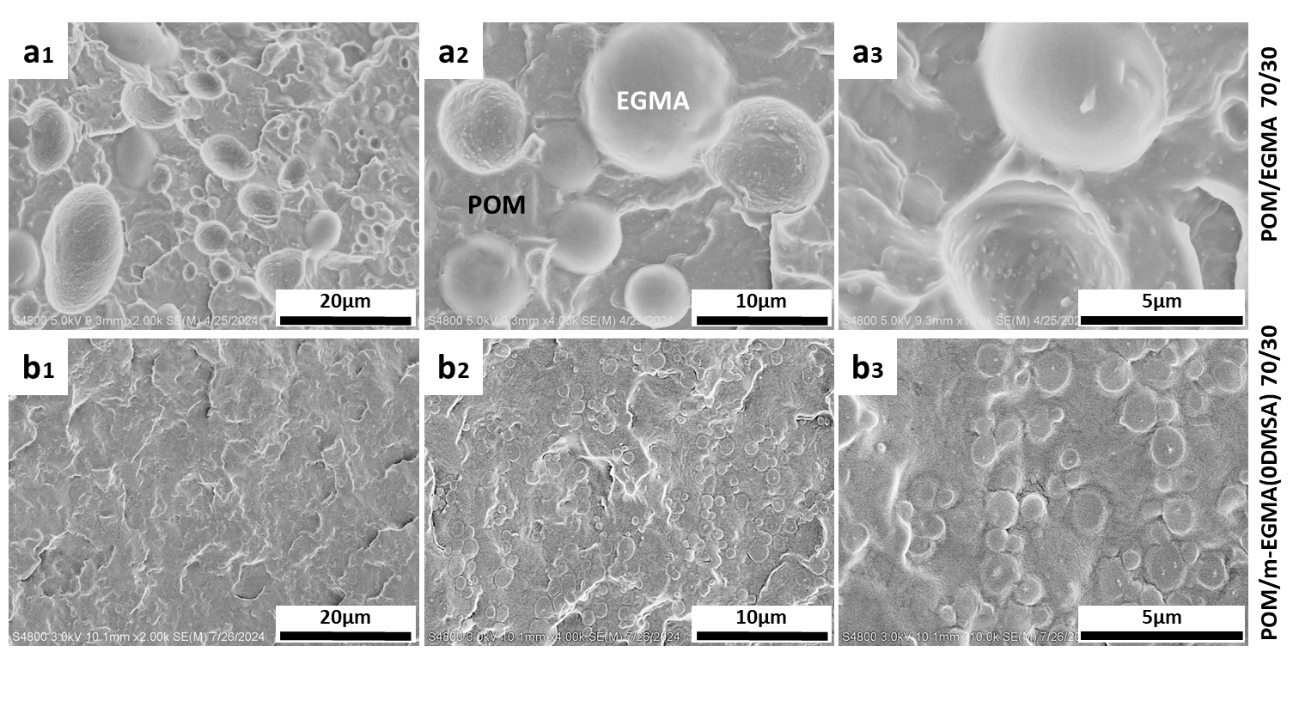


# **Figure S4**. SEM images of conventional POM alloys featuring “sea-island” morphology: (a) POM/EGMA 70/30 (w/w) alloys and (b) POM/m-EGMA (0% DMSA) 70/30 alloys. Note that m-EGMA (0% DMSA) referred to the elastomer with weight ratio of 10/20 (EGMA/PLLA) without addition of catalyst.


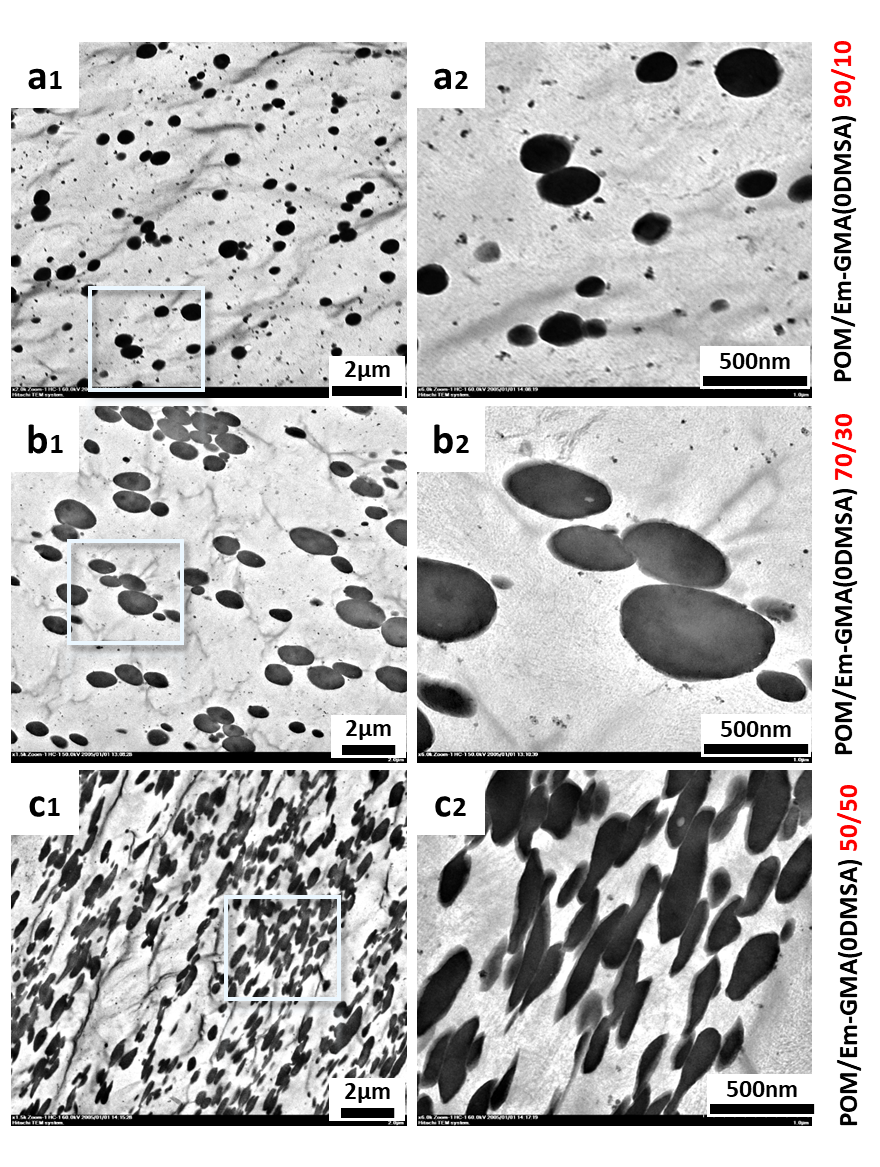


# **Figure S5**. TEM images of conventional POM alloys featuring “sea-island” morphology with various compositional ratio of POM/m-EGMA (0DMSA) ranging from (a) 90/10, (b) 70/30, to (d) 50/50. Note that m-EGMA (0% DMSA) referred to the elastomer with weight ratio of 10/20 (EGMA/PLLA) without addition of catalyst.


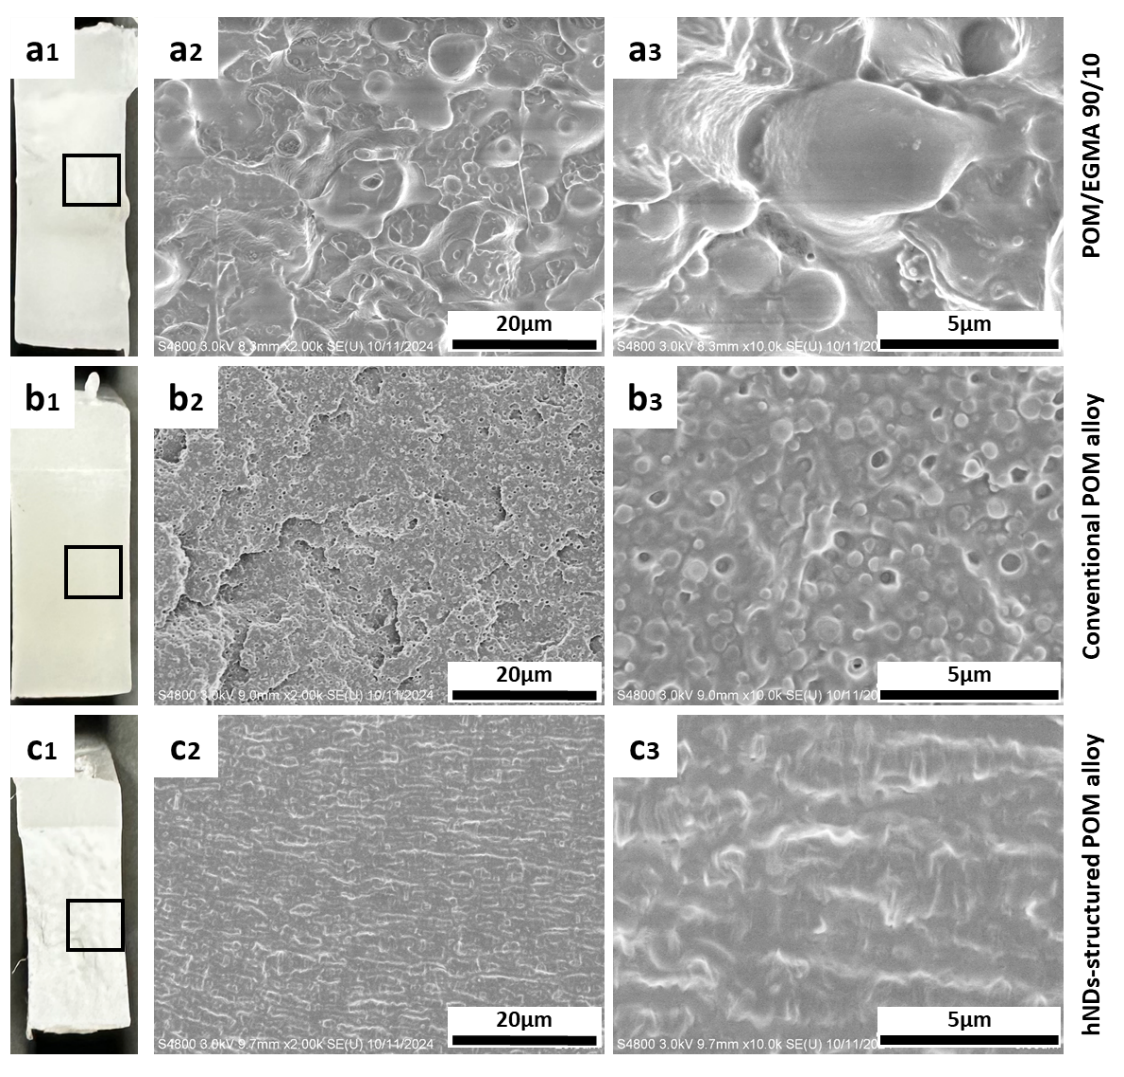


# **Figure S6**. Digital photos and SEM images of representative specimen after the notched izod impact tests: (a) POM/EGMA 90/10 alloy, (b) POM/m-EGMA (0DMSA) 70/10 alloy demonstrating conventional droplet/matrix morphology, and (c) POM/m-EGMA 70/10 alloy featuring “heterogeneously dispersed nano-domains” (hDNs) microstructure. Note that the concentration of EGMA in the three POM alloys was fixed as 10 wt%. The weigh ratio of EGMA/PLLA was fixed as 10/20 in m-EGMA (0DMSA) and m-EGMA.


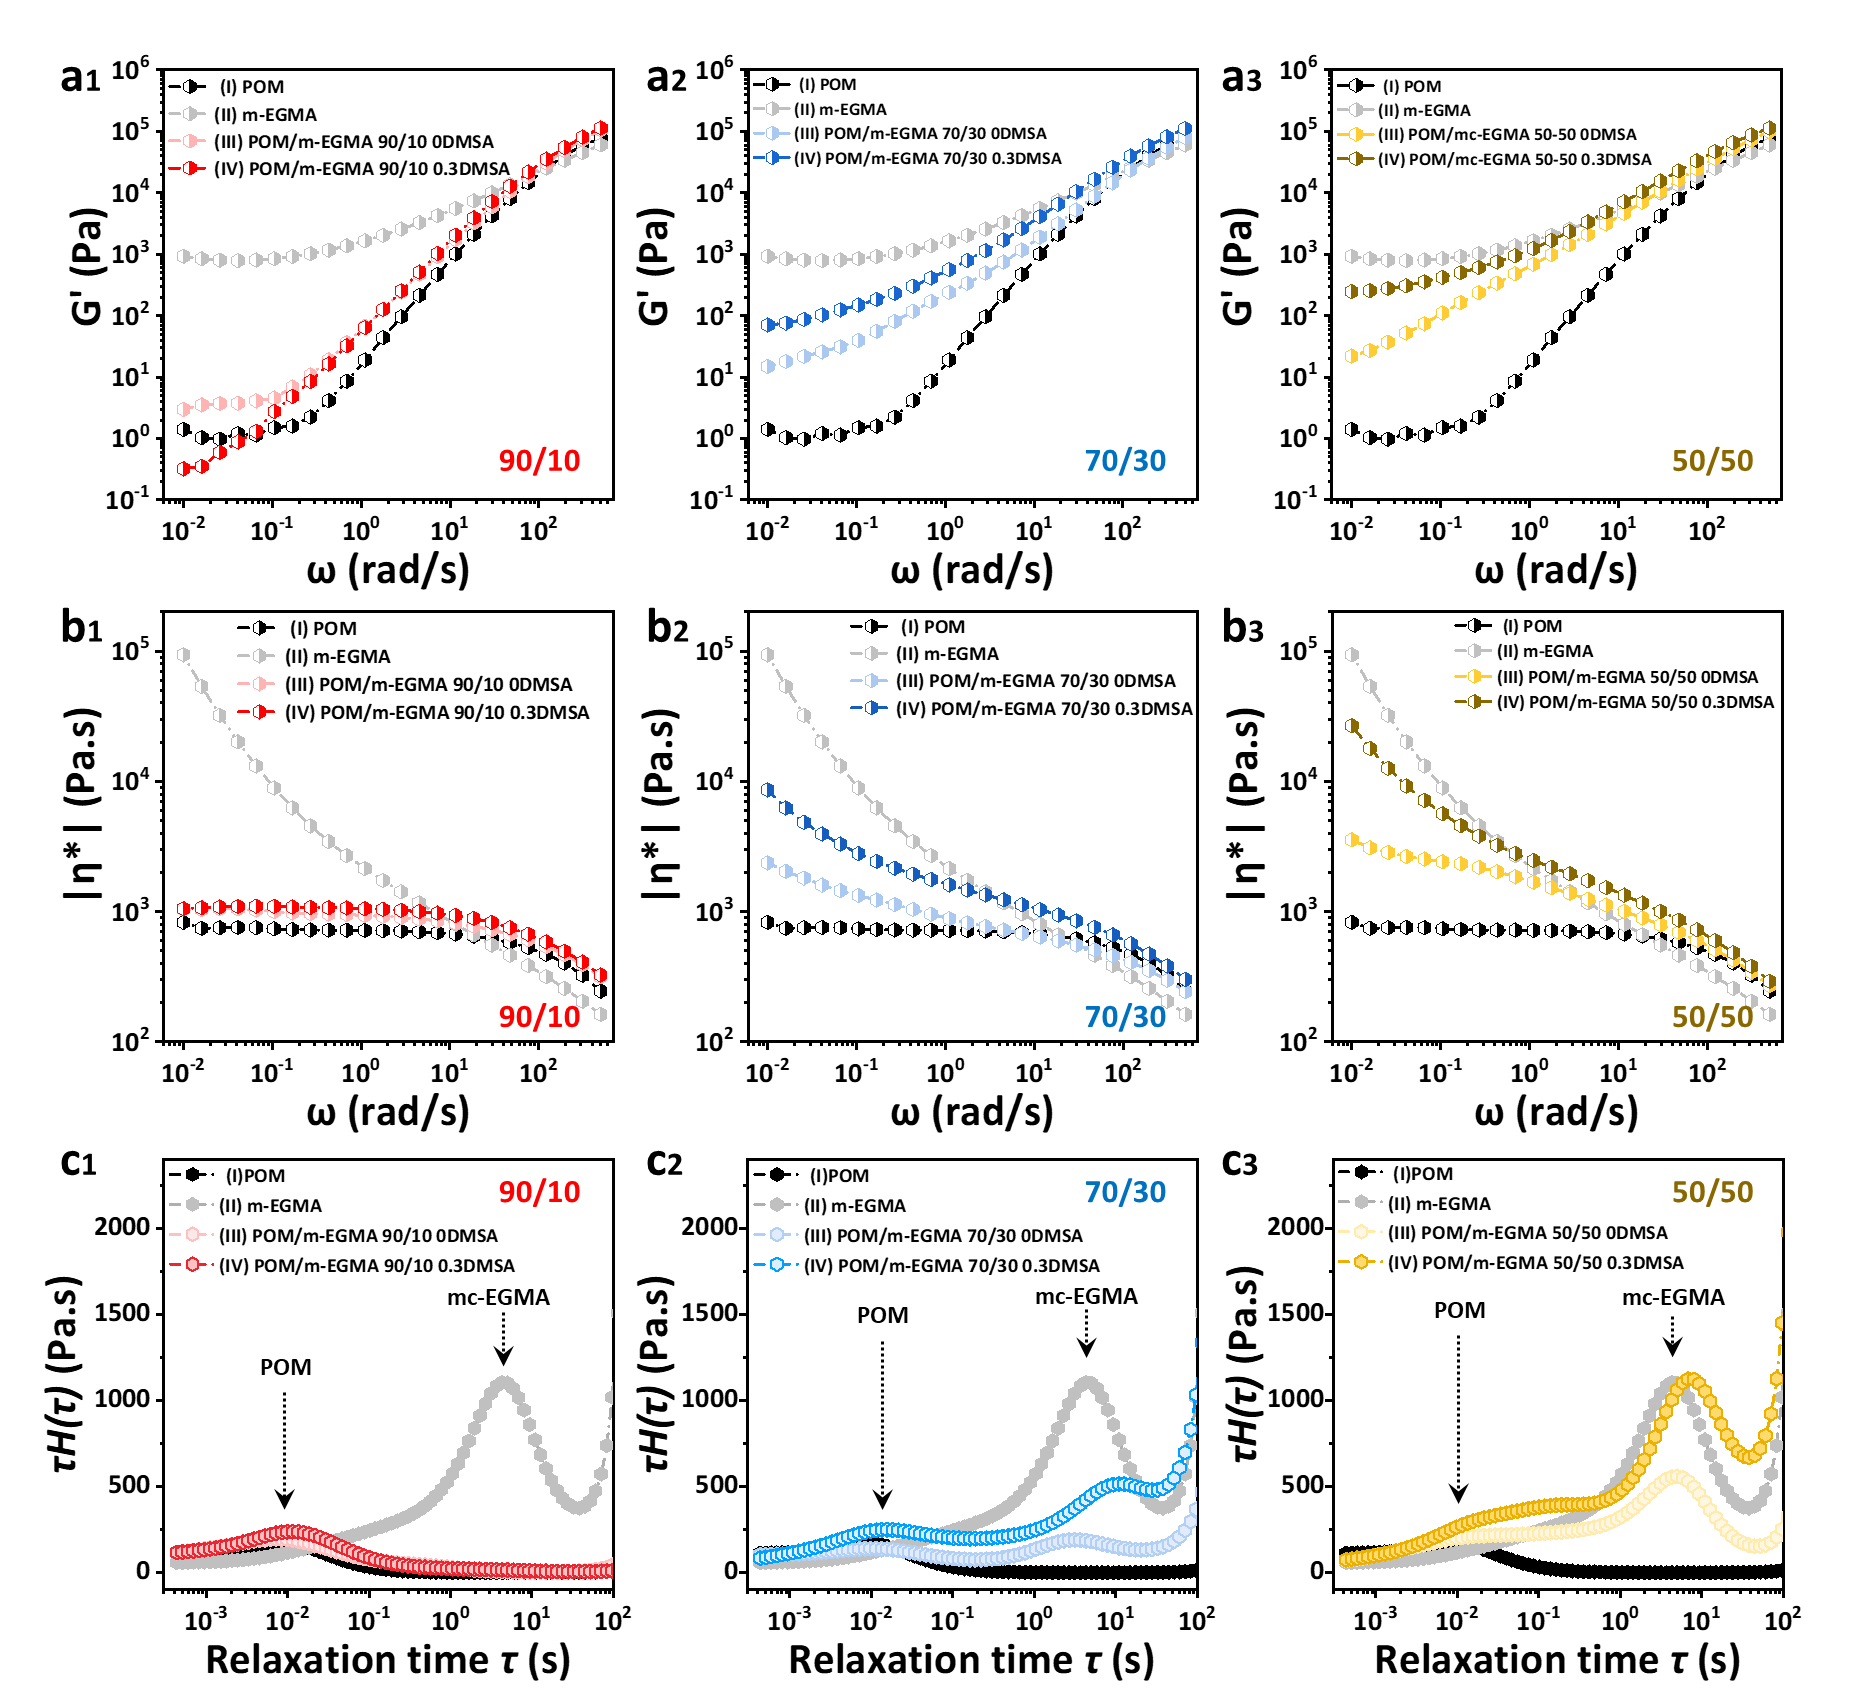


# **Figure S7**. Linear rheological behaviors of POM, m-EGMA, and POM alloys featuring conventional droplet/matrix and “heterogeneously dispersed nano-domains” (hDNs) microstructure. (a) Storage modulus (*G'(ω)*), (b) Complex viscosity (*|η*(ω)|*) against angular frequency, and (c) Weighted relaxation spectrum estimated from SAOS experiments at 190 oC.


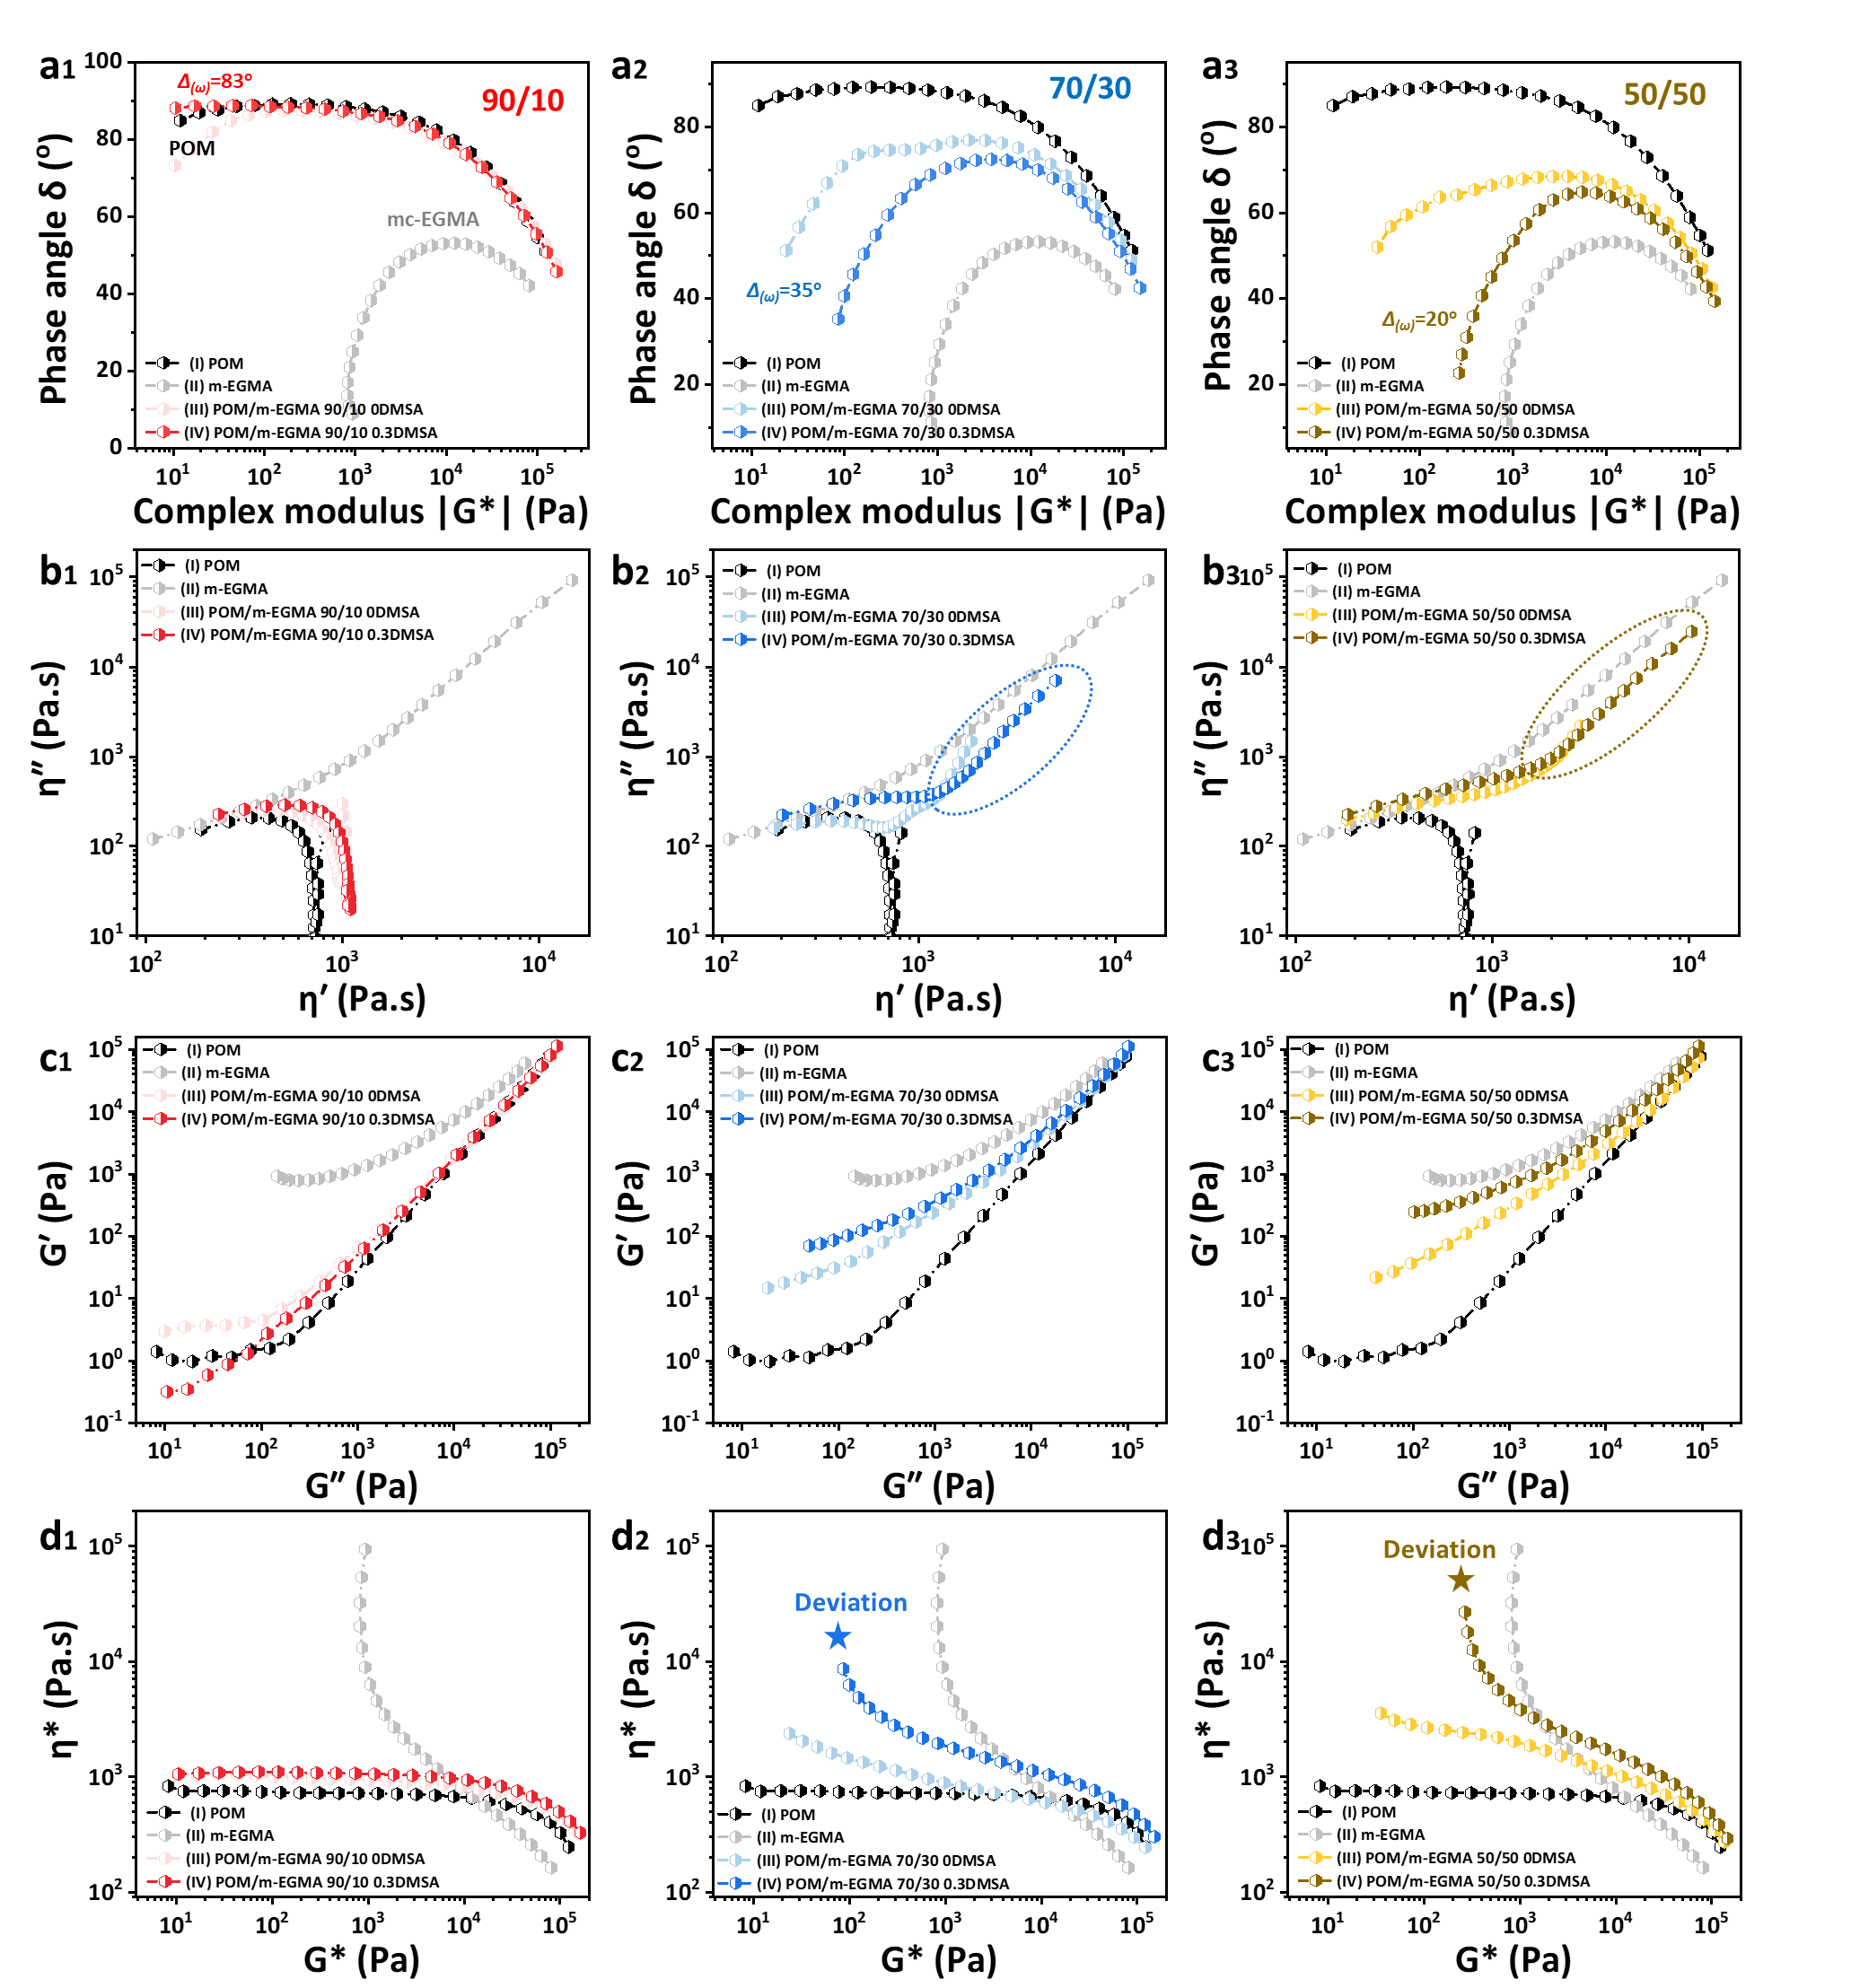


# **Figure S8**. Representative criteria estimated from SAOS experiments: (a) van Gurp-Palmen plots, (b) Cole-Cole plots, (c) Han plots, and (d) plots on *|η*(ω)|* versus *|G*(ω)|* of POM, m-EGMA, and POM alloys featuring conventional droplet/matrix and “heterogeneously dispersed nano-domain” (hDNs) microstructure.


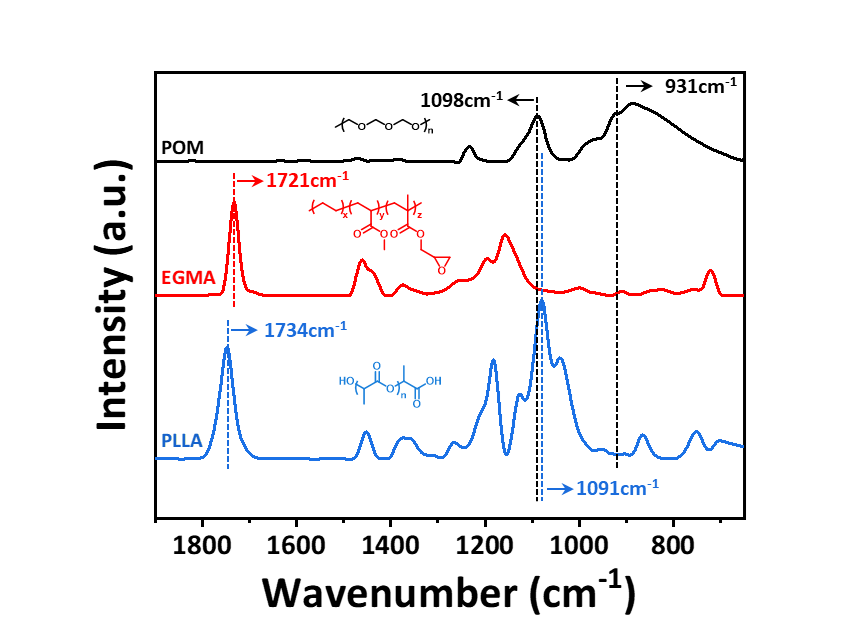


# **Figure S9**. FT-IR spectrum of pristine POM, EGMA, and PLLA.


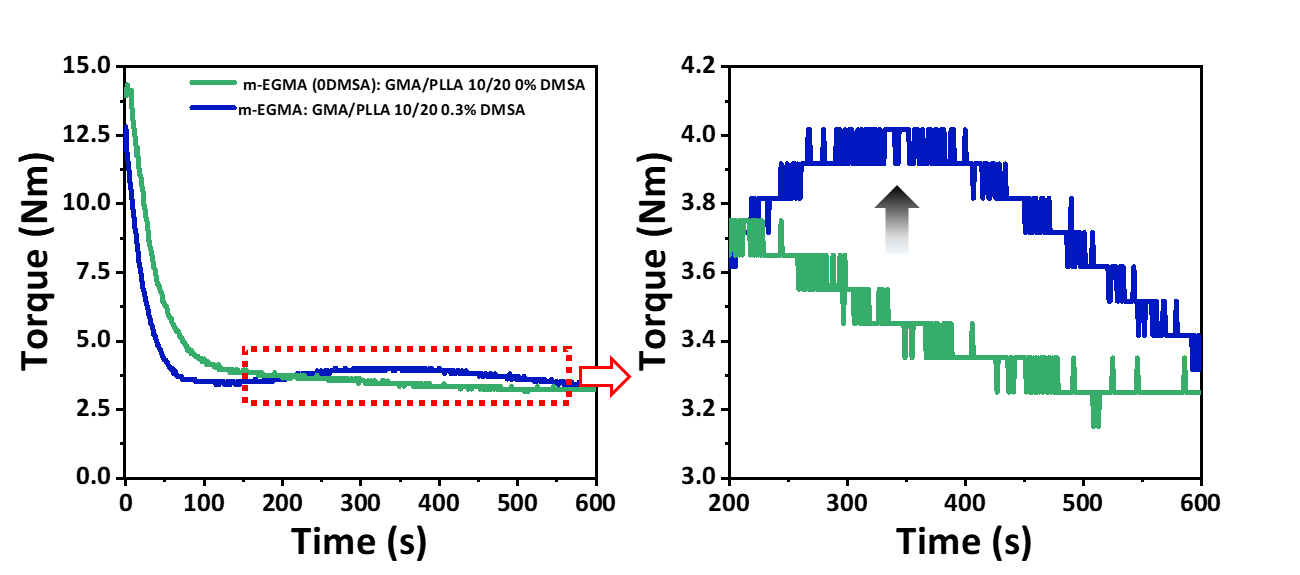


# **Figure S10**. Torque evolution curves of m-EGMA without or with addition of catalyst (DMSA). The melt processing was conducted at 190 oC with a rotation speed of 50 r/min for 10 min.


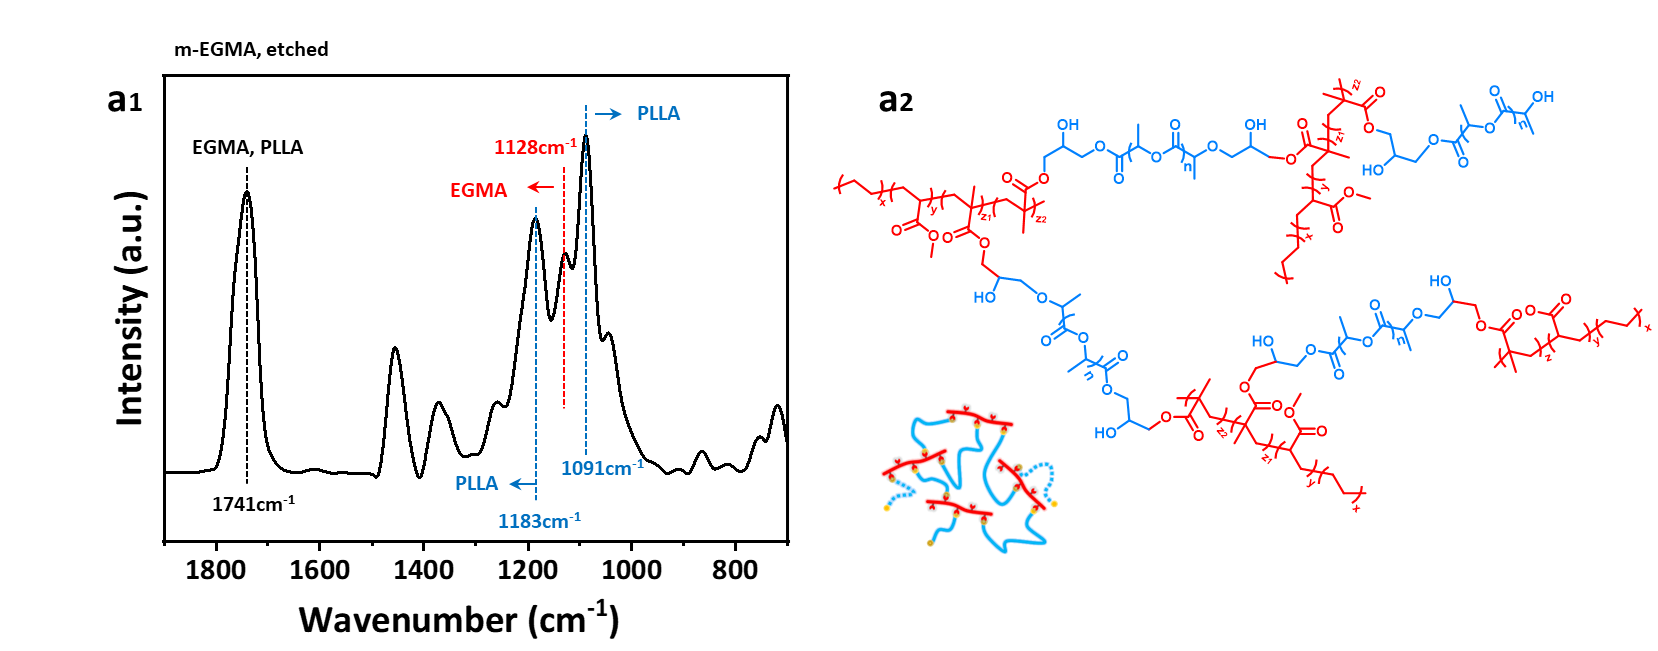


# **Figure S11**. FT-IR spectrum of m-EGMA (0.3DMSA) after selective extraction of free PLLA chains by chloroform using Soxhlet apparatus at 110 oC for 36 h. The weigh ratio of EGMA/PLLA was 10/20.


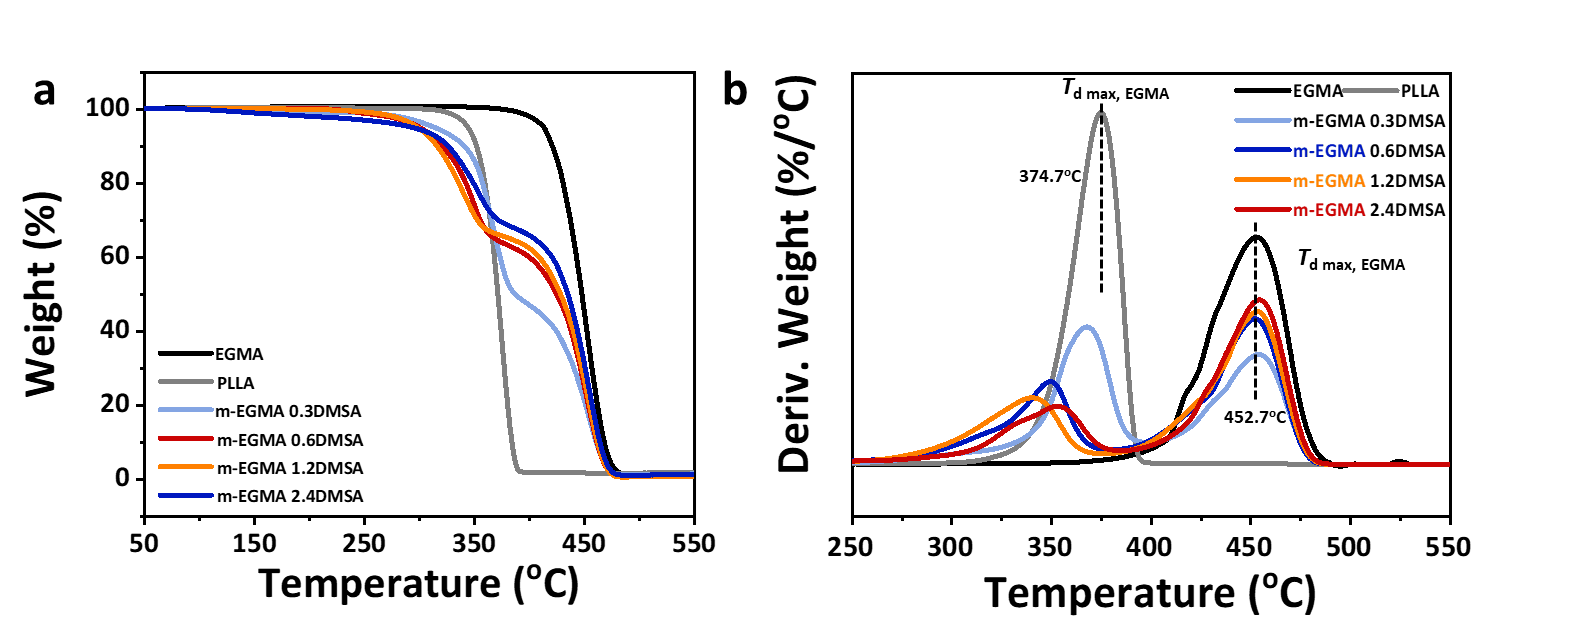


# **Figure S12**. (a) TGA and (DTG) curves of EGMA, PLLA, and m-EGMA after selective extraction of free PLLA chains by chloroform. The weigh ratio of EGMA/PLLA in m-EGMA was fixed as 10/20 containing various concentration of DMSA from 0.3 wt%, 0.6 wt%, 1.2 wt%, to 2.4 wt%.


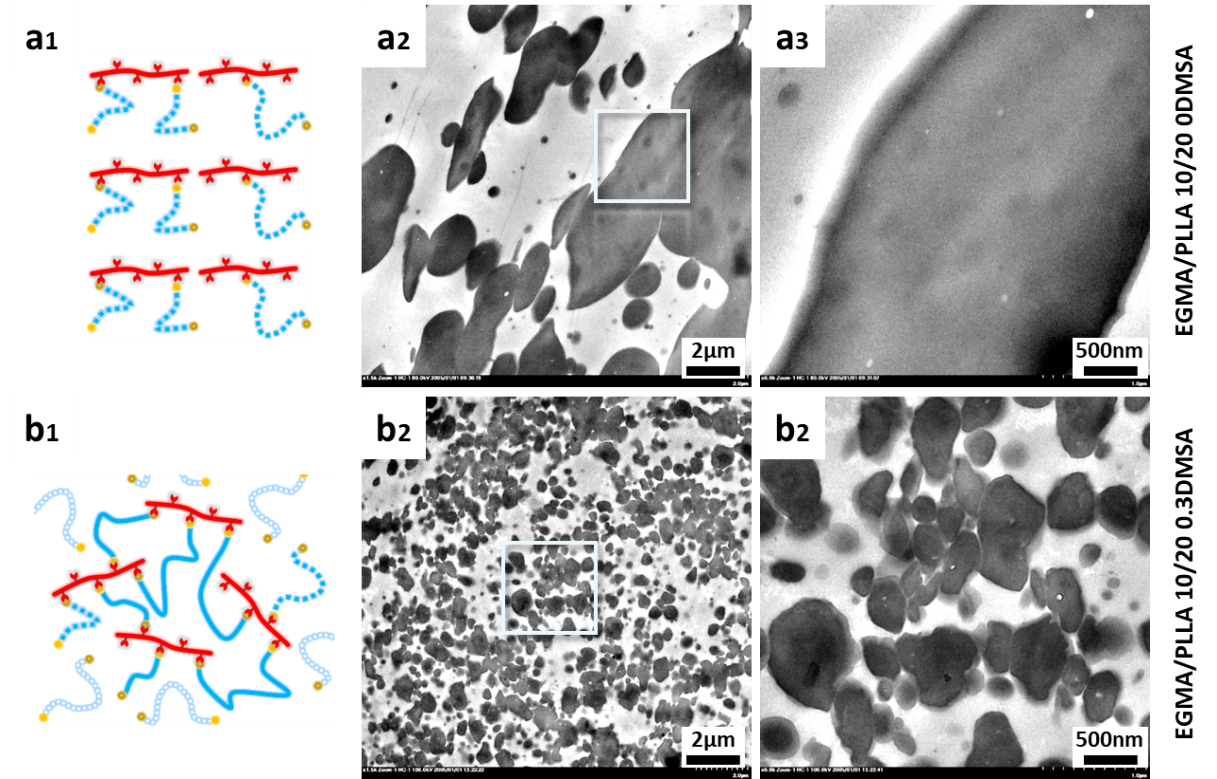


# **Figure S13**. Schematic illustrations and TEM images of m-EGMA with or without addition of DMSA. The weigh ratio of EGMA/PLLA in m-EGMA was fixed as 10/20.


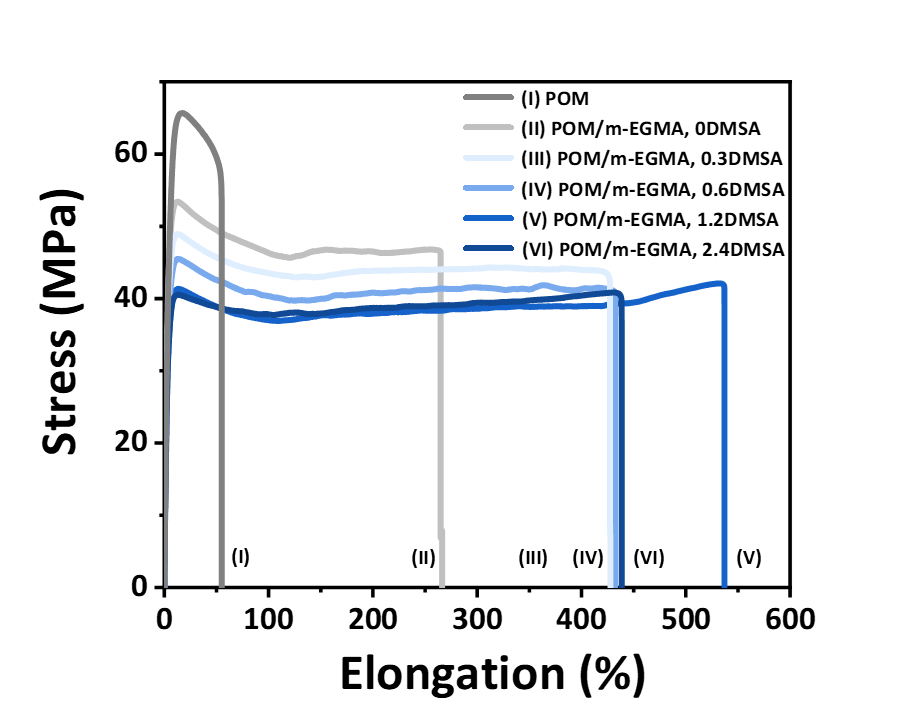


# **Figure S14**. Representative stress-strain curves of POM and hDNs-structured POM/m-EGMA alloys. The weigh ratio of EGMA/PLLA in m-EGMA was fixed as 10/20 containing various concentration of DMSA from 0.3 wt%, 0.6 wt%, 1.2 wt%, to 2.4 wt%.


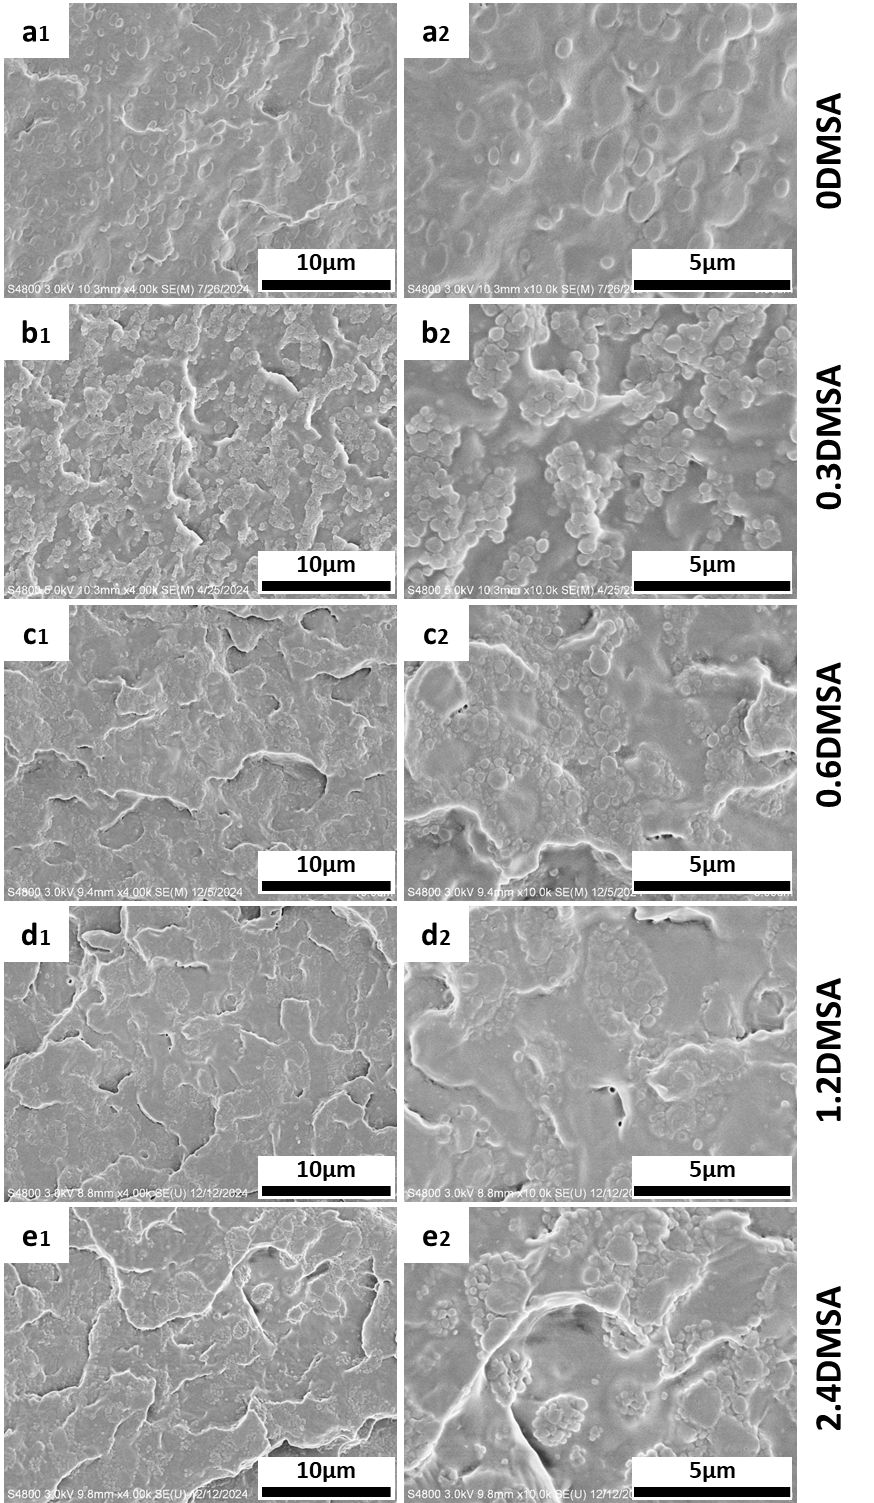


# **Figure S15**. SEM images of POM/(EGMA/PLLA) 70/(10/20) alloys with different concentration of DMSA: (a) 0 wt%, (b) 0.3 wt%, (c) 0.6 wt%, (d) 1.2 wt%, and (e) 2.4 wt%.


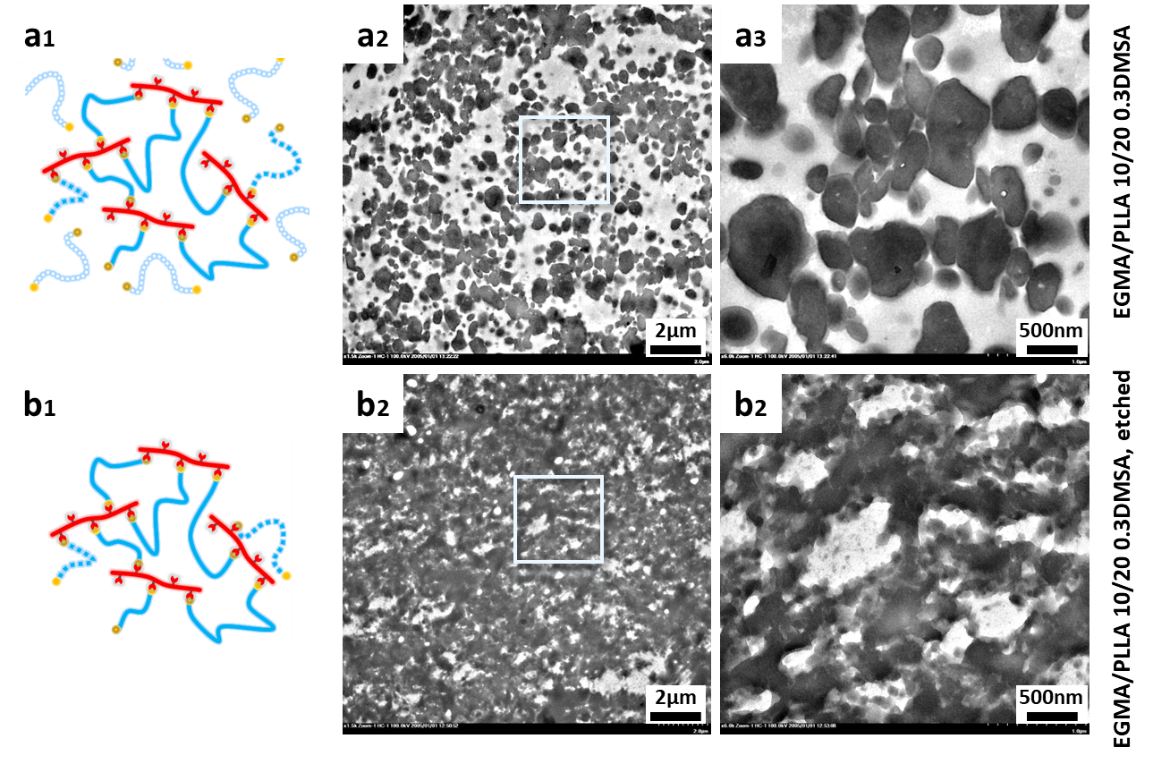


# **Figure S16**. TEM images of m-EGMA (EGMA/PLLA 10/20, 0.3 wt% DMSA) (a) before, (b) after selective extraction of free PLLA chains by CHCl3 by Soxhlet apparatus at 110 oC for 36 h.


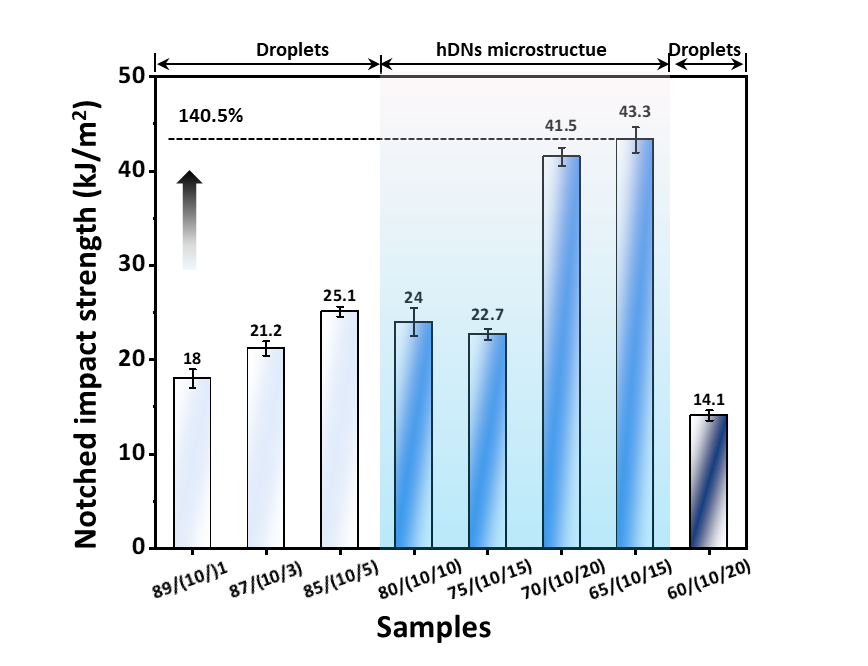


# **Figure S17**. Notched impact strength of “heterogeneously dispersed nano-domains” (hDNs)-structured alloys incorporating various compositional ratio of PLLA in m-EGMA. The EGMA loadings in the obtained alloys was fixed as 10 wt%. The content of DMSA in m-EGMA was fixed as 0.3 wt%.


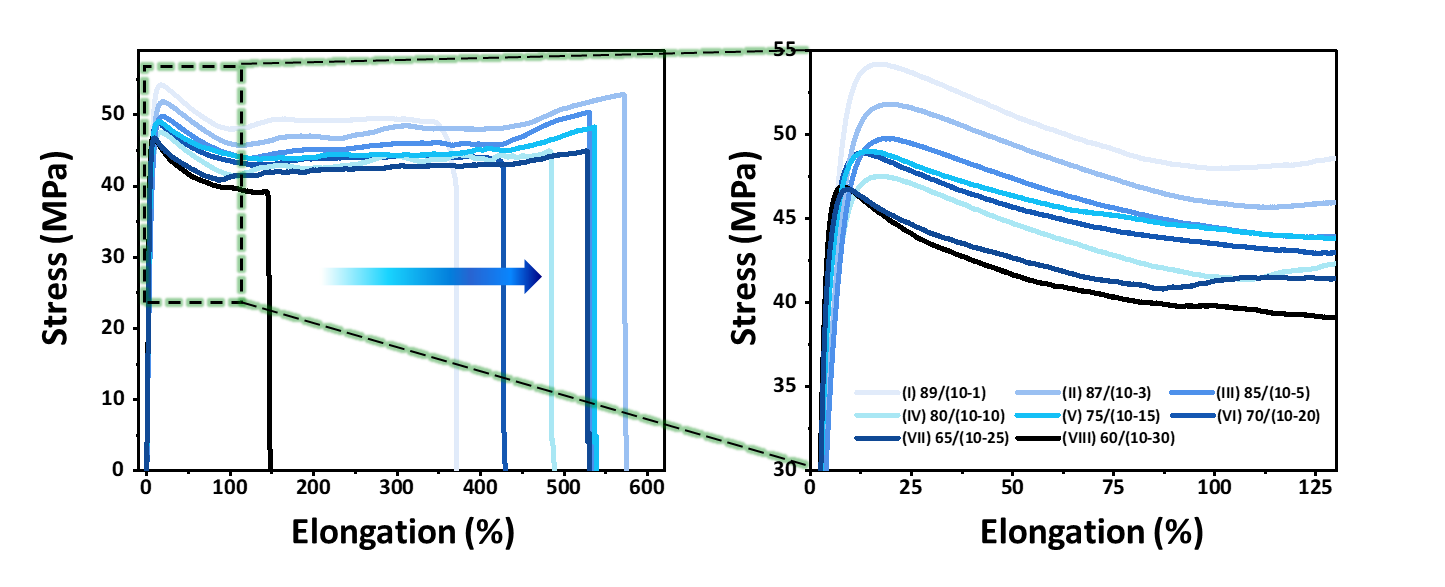


# **Figure S18**. Representative stress-strain curves of “heterogeneously dispersed nano-domains” (hDNs)-structured alloys incorporating various compositional ratio of PLLA in m-EGMA. The EGMA loadings in the obtained alloys was fixed as 10 wt%. The concentration of DMSA in m-EGMA was fixed as 0.3 wt%.


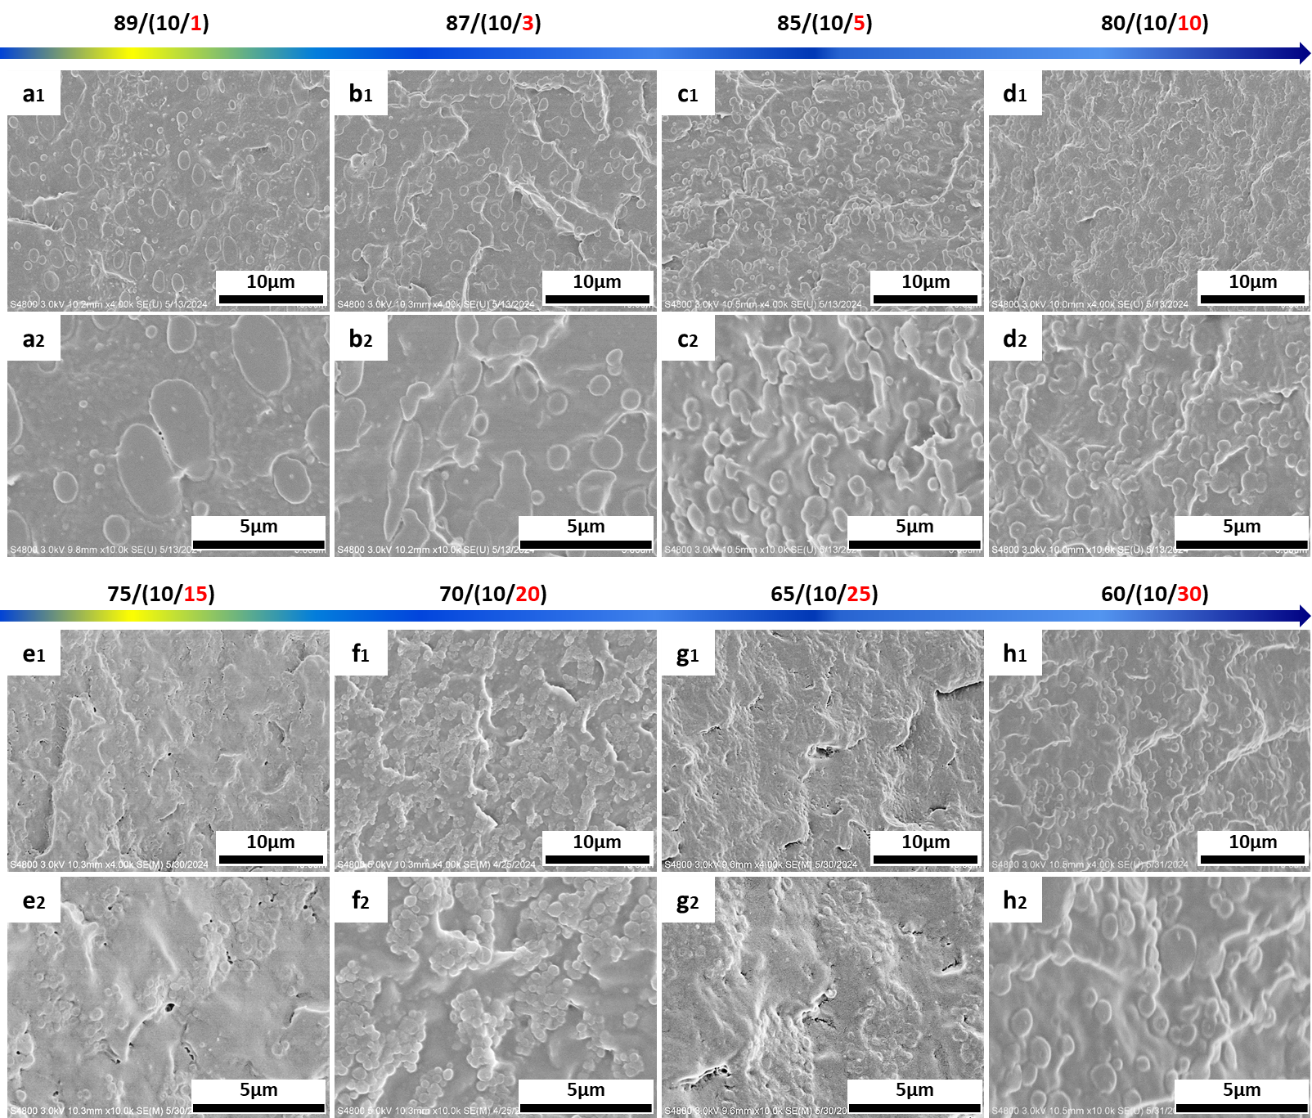


# **Figure S19**. SEM images of “heterogeneously dispersed nano-domains” (hDNs)-structured alloys incorporating various compositional ratio of PLLA in m-EGMA from (a) 89/(10/1), (b) 87/(10/3), (c) 85/(10/5), (d) 80/(10/10), (e) 75/(10/15), (f) 70/(10/20), (g) 65/(10/25), to (h) 60/(10/30). The concentration of DMSA in m-EGMA was fixed as 0.3 wt%.


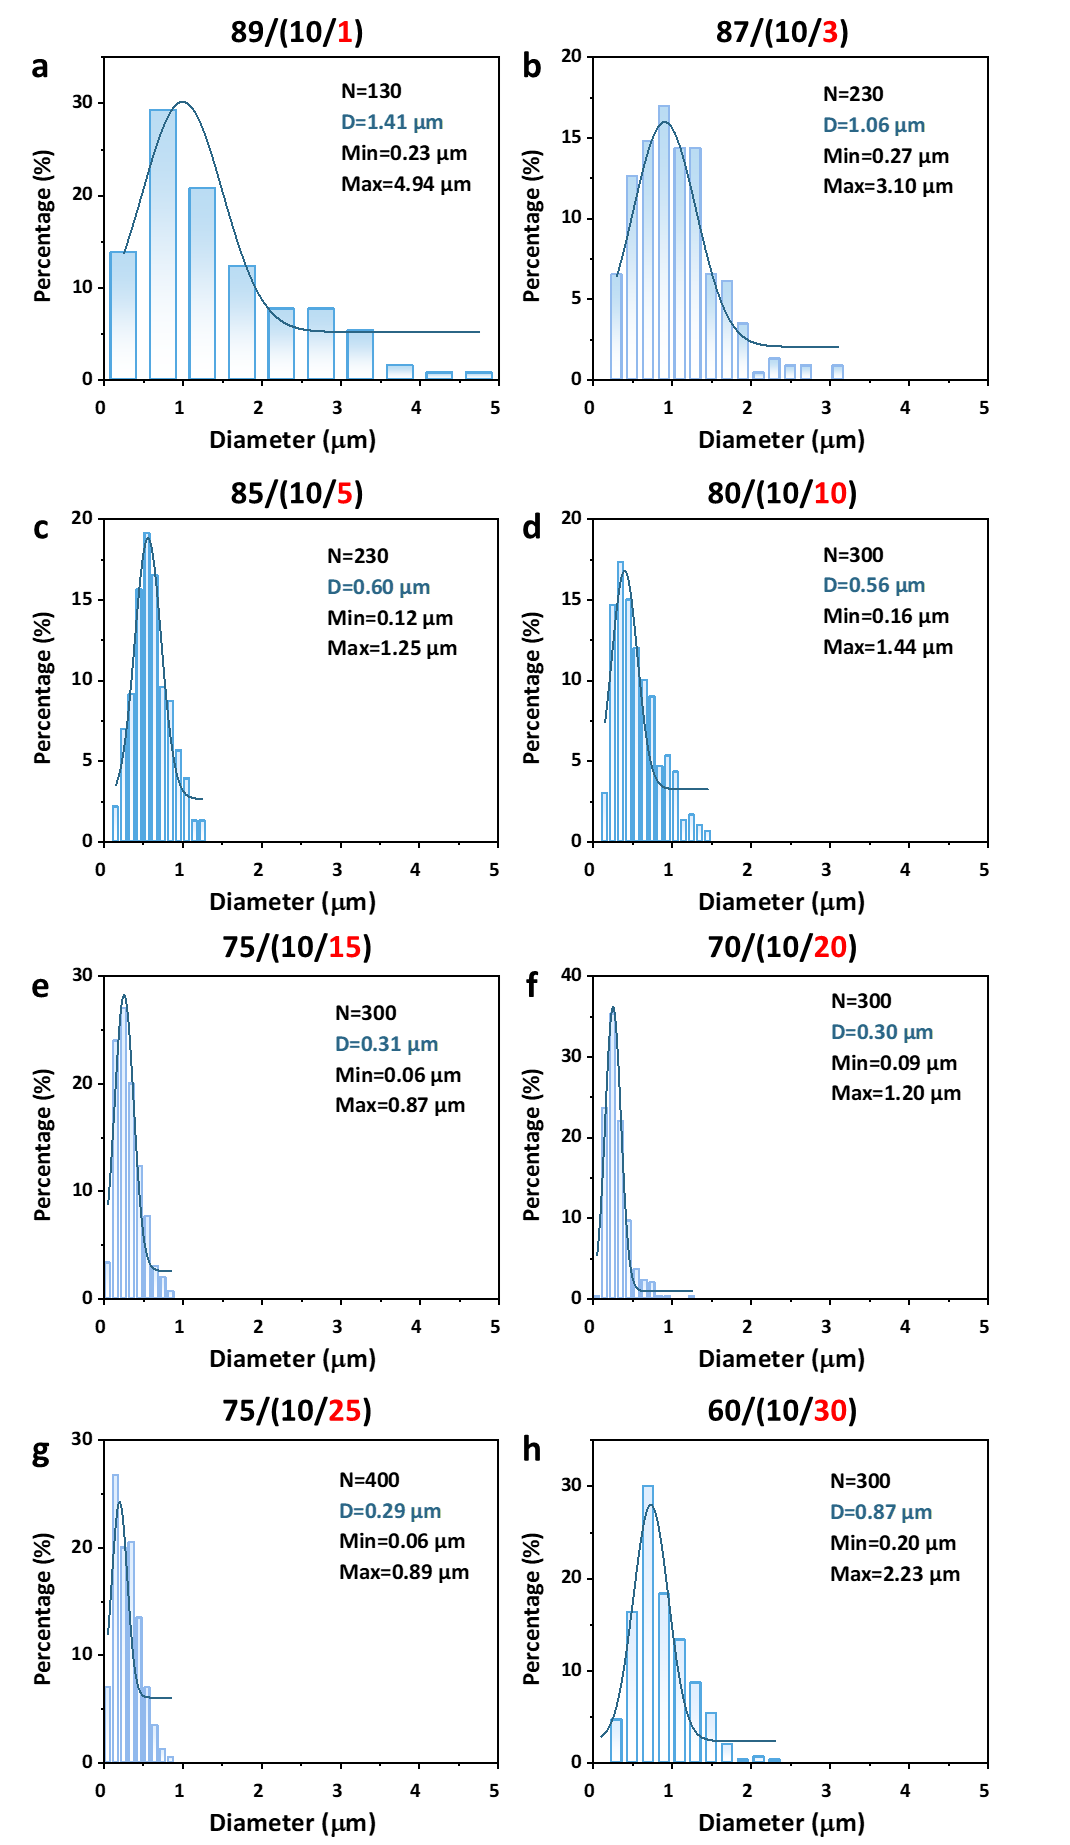


# **Figure S20**. Statistical data of the diameter of EGMA nano-domains in “heterogeneously dispersed nano-domains” (hDNs)-structured alloys incorporating various compositional ratio of PLLA in m-EGMA from (a) 89/(10/1), (b) 87/(10/3), (c) 85/(10/5), (d) 80/(10/10), (e) 75/(10/15), (f) 70/(10/20), (g) 65/(10/25), to (h) 60/(10/30). The concentration of DMSA in m-EGMA was fixed as 0.3 wt%.


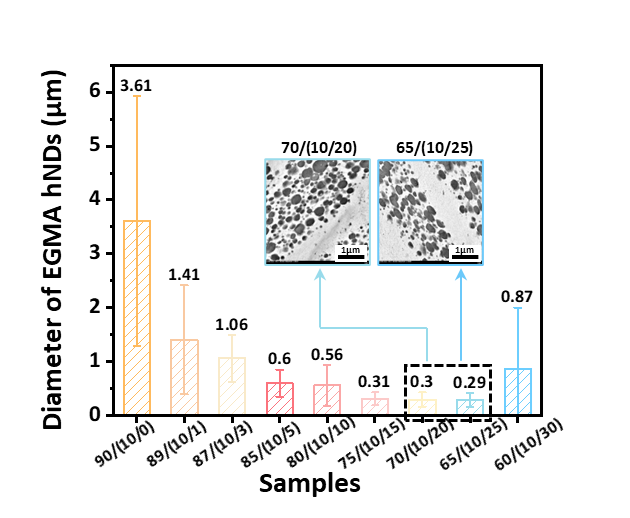


# **Figure S21**. Averaged diameter of EGMA nano-domains in “heterogeneously dispersed nano-domains” (hDNs)-structured alloys as a function of PLLA loadings in m-EGMA.


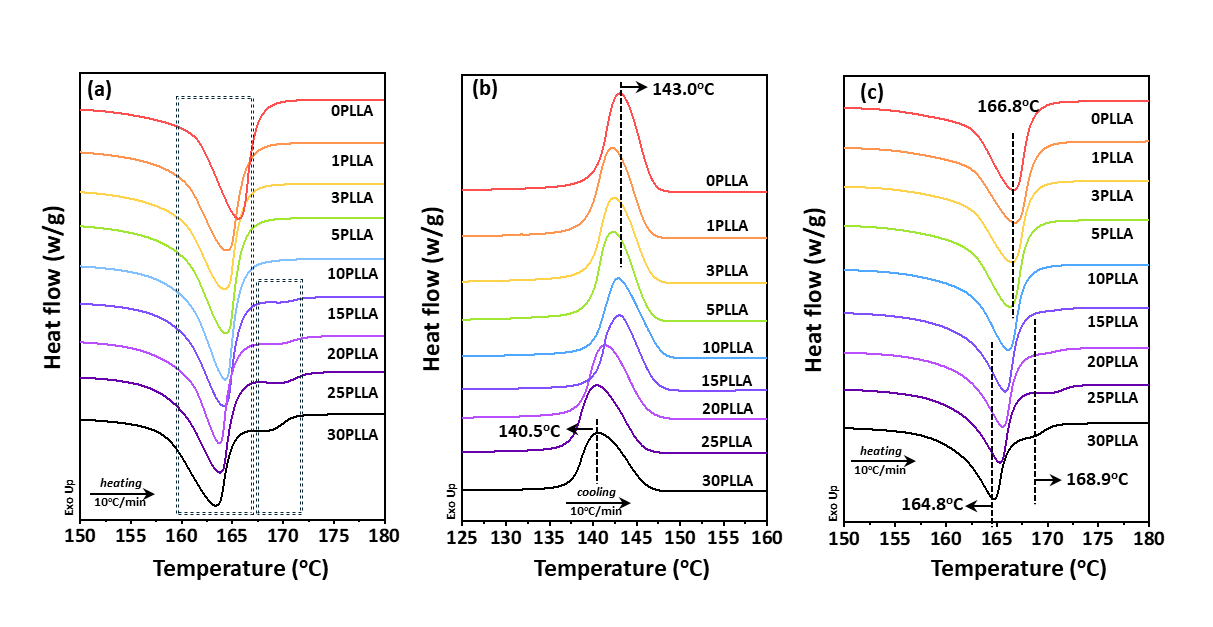


# **Figure S22**. DSC thermograms of “heterogeneously dispersed nano-domains” (hDNs)-structured alloys incorporating various compositional ratio of PLLA in m-EGMA collected at (a) first heating, (b) cooling, and (c) second heating procedure with the heating/cooling rate of 10 oC/min.


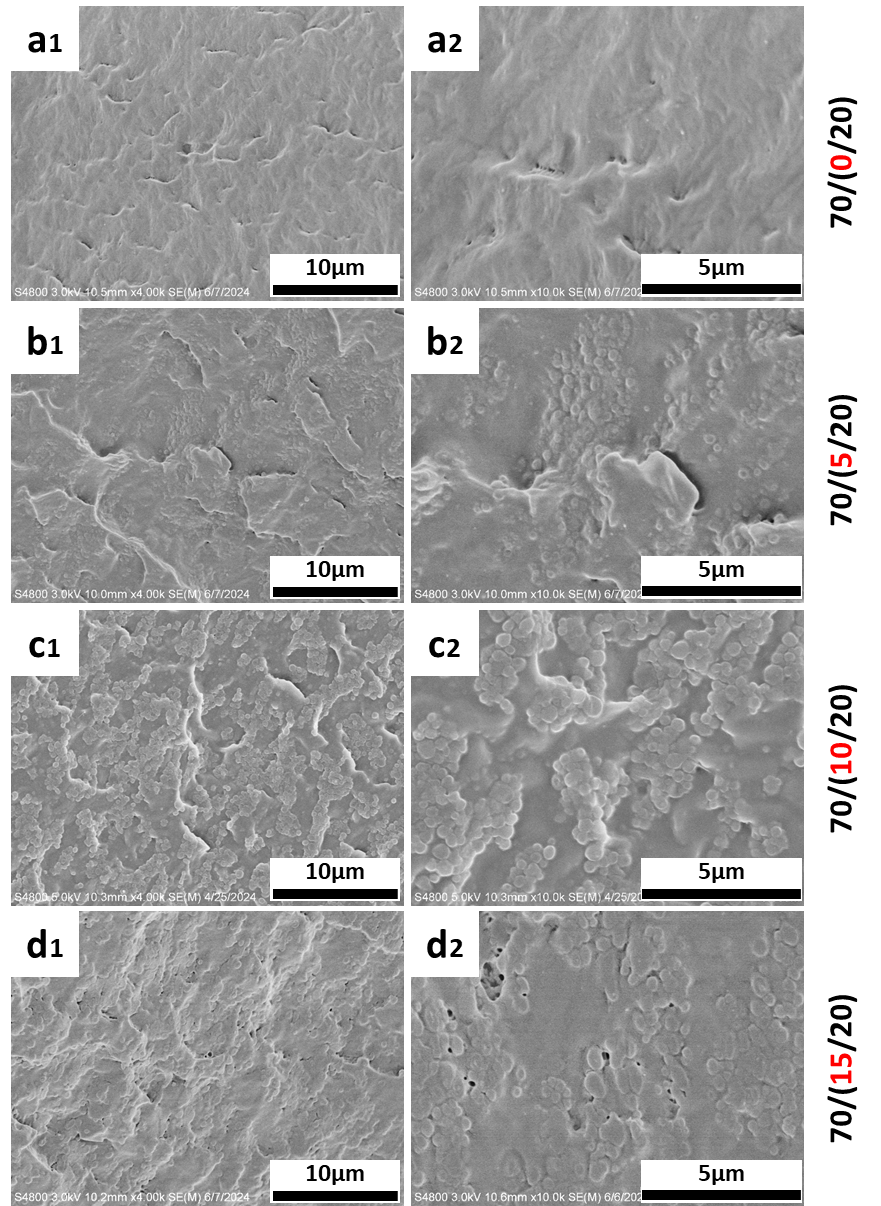


# **Figure S23**. SEM images of “heterogeneously dispersed nano-domains” (hDNs)-structured alloys as a function of EGMA loadings in m-EGMA, that is POM/(EGMA/PLLA) from (a) 70/(0/20), (b) 70/(5/20), (c) 70/(10/20), to (d) 70/(15/20).


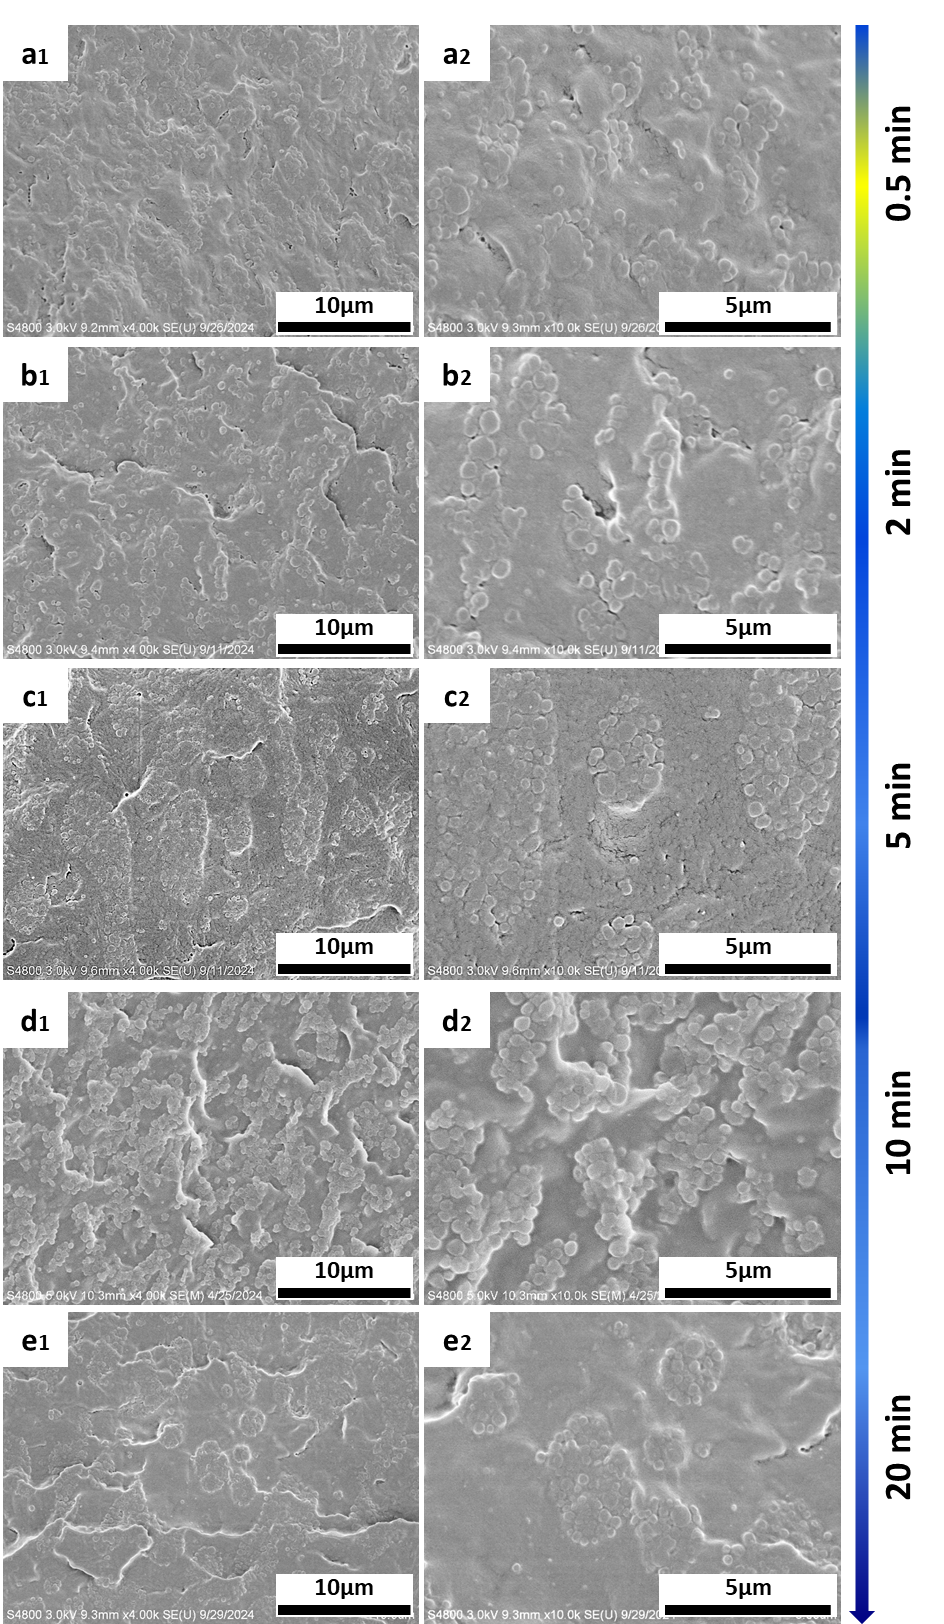


# **Figure S24**. SEM images of representative hDNs-structured alloy POM/(EGMA/PLLA) 70/(10/20) captured at different processing times at 190 oC with a rotation speed of 50 r/min: from (a) 0.5min, (b) 2 min, (c) 5 min, (d) 10 min, to (e) 20min.

# **Table S1**. Mechanical parameters of POM, conventional POM/m-EGMA (0DMSA) alloys featuring droplet/matrix morphology and POM/m-EGMA (0.3DMSA) alloys featuring “heterogeneously dispersed nano-domains” microstructure.

|  | **Young’s modulus/GPa** | **Tensile strength/MPa** | **Elongation at break/%** | **Notched impact strength/kJ/m2** |
| --- | --- | --- | --- | --- |
| POM | 1.38 ± 0.03 | 66 ± 0.1 | 56 ± 8 | 12.3 ± 1.7 |
| 90/10 conventional | 1.23 ± 0.01 | 55 ± 0.5 | 76 ± 13 | 13.4 ± 0.5 |
| 90/10 hNDs | 1.37 ± 0.05 | 59 ± 0.6 | 73 ± 8 | 19.5 ± 0.4 |
| 70/30 conventional | 1.37 ± 0.02 | 50 ± 0.6 | 217 ± 30 | 17.7 ± 0.9 |
| 70/30 hNDs | 1.36 ± 0.02 | 50 ± 1.0 | 429 ± 173 | 41.5 ± 1.0 |
| 50/50 conventional | 1.31 ± 0.04 | 38 ± 0.5 | 221 ± 21 | 28.9 ± 1.1 |
| 50/50 hNDs | 1.36 ± 0.05 | 44 ± 1.4 | 428 ± 86 | 58.6 ± 3.5 |

# **Table S2**. Performance comparison in terms of notched impact strength, elongation at break, and tensile strength of POM alloys.

| Code | Elastomer/inorganic filled modified POM alloys | Elongation at break | Tensile strength  (MPa) | Notched impact strength (kJ/m2) | Ref.a |
| --- | --- | --- | --- | --- | --- |
| 1 | POM | 56 | 66 | 12.3 |  |
| 2 | POM/E-MA-GMA | 95 | - | 8.08 | [1] |
| 3 | POM/CB | 30 | 57.9 | 8.29 | [2] |
| POM/CB/1.5NCC | 31 | 59.7 | 10.11 |
| POM/CB/3NCC | 33 | 62.4 | 9.96 |
| POM/CB/4.5NCC | 30 | 60.9 | 7.39 |
| 4 | POM/5%GCE | 40 | 45 | 13 | [3] |
| POM/10%GCE | 63 | 42 | 13.5 |
| POM/20%GCE | 72 | 31 | 15.5 |
| POM/30%GCE | 76 | 26.8 | 16.7 |
| 5 | POM/PTFE plasma 0min | 7 | 26 | 8.9 | [4] |
| POM/PTFE plasma 5min | 7.5 | 27 | 11.6 |
| POM/PTFE plasma 15min | 8.3 | 29 | 11.0 |
| POM/PTFE plasma 30min | 8.5 | 28 | 10.3 |
| 6 | POM/APP | - | 40.7 | 2.6 | [5] |
| POM/MC-APP | - | 45.5 | 3.1 |
| POM/GW-APP | - | 42.2 | 2.8 |
| POM/MF-APP | - | 42.5 | 2.2 |
| 7 | POM/SGF-HT | 1.9 | 78 | - | [6] |
| POM/SGF-NC | 1.6 | 83.9 | - |
| POM/SGF-WD | 3 | 85.2 | - |
| 8 | PLA/PCL/POM 80/20/1 | 154.4 | 45.0 | - | [7] |
| PLA/PCL/POM 80/20/2 | 202.7 | 46.4 | - |
| PLA/PCL/POM 80/20/3 | 312.8 | 44.1 | - |
| PLA/PCL/POM 70/30/1 | 218.8 | 37.5 | - |
| PLA/PCL/POM 70/30/2 | 315.9 | 38.4 | - |
| PLA/PCL/POM70/30/3 | 334.8 | 41.2 | - |
| 9 | POM/RCF 5% | 3.1 | 91 | 4.3 | [8] |
| POM/RCF 10% | 3.0 | 120 | 5.9 |
| 10 | POM40/PLA40/EBA20-CE | 17.6 | 40 | 4.9 | [9] |
| POM/EBA20 | 16 | 34 | 5.6 |
| POM40/PLA40/EBA20 | 15 | 35 | 4.9 |
| POM/EBA20-CE | 16.3 | 33 | 4.8 |
| 11 | POM/0.1GNP | 47 | 57.3 | 14.7 | [10] |
| POM/0.5GNP | 55.2 | 61.9 | 17.6 |
| POM/1GNP | 52 | 59.7 | 11.7 |
| 12 | POM/graphite | 11.8 | 59 | 5.6 | [11] |
| POM/graphite/T-1 | 17.9 | 58 | 5.6 |
| POM/graphite/T-2 | 25.5 | 57 | 5.9 |
| 13 | POM/PEO 90/10 5 (injection speed) | 82.3 | 46.2 | 7.9 | [12] |
| POM/PEO 90/10 | 89.7 | 46.5 | 7.8 |
| POM/PEO 90/10 20 | 88.3 | 46.0 | 8.8 |
| POM/PEO 90/10 50 | 89.5 | 46.2 | 10.8 |
| POM/PEO 90/10 80 | 85.0 | 46.8 | 11.3 |
| POM/PEO 90/10 120 | 86.5 | 45.7 | 10.5 |
| 14 | POM/MBS/TPU 80/15/0 | 108.67 | 44.63 | 28.25 | [13] |
| POM/MBS/TPU 80/15/5 | 193.35 | 39.85 | 37.19 |
| POM/MBS/TPU 80/15/10 | 222.51 | 38.90 | 40.83 |
| 15 | POM/10TPU | 64.5 | 47.1 | 37.5 (119.05J/m) | [14] |
| POM/20TPU | 85.0 | 41.2 | 43.2 (137.01J/m) |
| 16 | POM/TUP 90/10 170oC | 42.9 | 47.1 | 9.4 | [15] |
| POM/TUP 90/10 180oC | 32.5 | 48.1 | 11.7 |
| POM/TUP 90/10 190oC | 37.3 | 47.5 | 14.4 |
| POM/TUP 90/10 200oC | 40.0 | 47.8 | 12.0 |
| 17 | POM/TPU Irradiated (3wt%) | 18.9 | 53.1 | 11.2 | [16] |
| POM/TPU Irradiated (6wt%) | 20.1 | 53.9 | 11.0 |
| POM/TPU Irradiated (9wt%) | 18.6 | 50.0 | 10.8 |
| 18 | This work | 429 | 49 | 41.5 |  |
| 620 | 44 | 52.9 |
| 530 | 47 | 43.3 |

a References:

1. Sun, A., Luo, F., Chen, R., Shih, T. M. & Guo, S. Toward supertough and heat-resistant binary blend: polyoxymethylene/elastomer via in-situ graft copolymer formation during one-pot reactive melt blending. *J. Polym. Res*. **30**, 101 (2023).

2. Mohsenzadeh, R., Soudmand, B. H. & Shelesh‐Nezhad, K. Synergetic impacts of two rigid nano-scale inclusions on the mechanical and thermal performance of POM/carbon black/CaCO3 ternary nanocomposite systems. *Polym. Composites* **43**, 3041-3056 (2022).

3. Babar, S., Ebenezer, K., Mishra, D., Patil, H. B., Nikam, P. & Rao, A. R. Synthesis of castor oil-based glycidyl carbamate polyurethane elastomer and its effect on toughening of polyoxymethylene. *J. Mater. Sci*. **58**, 7209-7226 (2023).

4. Huang, C. Y. & Tseng, C. I. The effect of interface modification between POM and PTFE on the properties of POM/PTFE composites. *J. Appl. Polym. Sci*. **78**, 800-807 (2000).

5. Kang, X., Liu, Y., Chen, N., Feng, W., Liu, B., Xu, Y., Li, J., Ding, T. & Fang, X. Influence of modified ammonium polyphosphate on the fire behavior and mechanical properties of polyformaldehyde. *J. Appl. Polym. Sci*. **138**, 50156 (2021).

6. Zhang, L., Zhuo, X., Shi, H., Yu, S., Tian, H., Chen, J., Hao, Y., Chen, L., Liu, W. & Xie, Y. Effects of glass fiber reinforcing and thermal post-reatment on the mechanical properties and crystallization behaviors of polyoxymethylene. *J. Appl. Polym. Sci*. **140**, 1-11 (2023).

7. Song, Z., Huang, X., Lu, X., Lv, Q., Xu, N., Pang, S., Pan, L. & Li, T. Improvement of microstructures and properties of poly (lactic acid)/poly (ε-caprolactone) blends compatibilized with polyoxymethylene. *J. Appl. Polym. Sci*. **135**, 46536 (2018).

8. Qian, Z., Wang, Y., Li, J., Wang, X. & Wu, D. Development of sustainable polyoxymethylene-based composites with recycled carbon fibre: mechanical enhancement, morphology, and crystallization kinetics. *J. Reinf. Plast. Comp*. **33**, 294-309 (2014).

9. Andrzejewski, J., Skórczewska, K. & Kloziński, A. Improving the toughness and thermal resistance of polyoxymethylene/poly (lactic acid) blends: Evaluation of structure–properties correlation for reactive processing. *Polymers* **12**, 307 (2020).

10. Rustamov, I., Xiang, L., Xia, Y. & Peng, W. Tribological and mechanical endowments of polyoxymethylene by liquid‐phase exfoliated graphene nanofiller. *Polym. Int*. **74**, 231-245 (2025).

11. Zhao, X. & Ye, L. Study on the thermal conductive polyoxymethylene/graphite composites. *J. Appl. Polym. Sci*. **111**, 759-767 (2009).

12. Bai, S. & Wang, Q. Effect of injection speed on phase morphology, crystallization behavior, and mechanical properties of polyoxymethylene/poly (ethylene oxide) crystalline/crystalline blend in injection processing. *Polym. Eng. Sci*. **52**, 1938-1944 (2012).

13. Yang, J., Yang, W., Wang, X., Dong, M., Liu, H., Wujcik, E. K., Shao, W., Wu, S., Ding, T. & Guo, Z. Synergistically toughening polyoxymethylene by methyl methacrylate-butadiene-styrene copolymer and thermoplastic polyurethane. *Macromol. Chem. Phys*. **220**, 1800567 (2019).

14. Chang, F. C. & Yang, M. Y. Mechanical fracture behavior of polyacetal and thermoplastic polyurethane elastomer toughened polyacetal. *Polym. Eng. Sci*. **30**, 543-552 (1990).

15. Cheng, Z., & Wang, Q. Morphology control of polyoxy-methylene/thermoplastic polyurethane blends by adjusting their viscosity ratio. *Polym. Int*. **55**, 1075-1080 (2006).

16. Ren, X. C., Chen, L., Zhao, H. J., Dan, Y. & Cai, X. F. Acrylate elastomer toughened and UV stabilized polyoxymethylene. *J. Macromol. Sci. B*. **46**, 411-421 (2007).

# **Table S3.** The content of EGMA and PLLA in m-EGMA containing various concentration of DMSA before and after selective extraction of free PLLA chains calculated from TGA measurements.

| **EGMA/PLLA 10/20** | **0.3DMSA** | **0.6DMSA** | **1.2DMSA** | **2.4DMSA** |
| --- | --- | --- | --- | --- |
| EGMA(before extraction)/g | 0.12 | 0.12 | 0.13 | 0.11 |
| EGMA(after extraction)/g | 0.03 | 0.04 | 0.07 | 0.08 |
| PLLA(before extraction)/g | 0.24 | 0.24 | 0.26 | 0.22 |
| PLLA(after extraction)/g | 0.01 | 0.01 | 0.02 | 0.02 |

# **Table S4**. Mechanical parameters of POM/(EGMA/PLLA) 70/(10/20) alloys with different concentration of DMSA: (a) 0 wt%, (b) 0.3 wt%, (c) 0.6 wt%, (d) 1.2 wt%, and (e) 2.4 wt%.

|  | **Young’s modulus/GPa** | **Tensile strength/MPa** | **Elongation at break/%** | **Notched impact strength/kJ/m2** |
| --- | --- | --- | --- | --- |
| 0DMSA | 1.36 ± 0.02 | 53 ± 0.4 | 266 ± 5 | 17.7 ± 0.9 |
| 0.3DMSA | 1.36 ± 0.02 | 50 ± 1.0 | 429 ± 173 | 41.5 ± 1.0 |
| 0.6DMSA | 1.31 ± 0.05 | 45 ± 0.5 | 432 ± 54 | 42.4 ± 0.8 |
| 1.2DMSA | 1.23 ± 0.02 | 41 ± 0.4 | 537 ± 36 | 21.2 ± 0.3 |
| 2.4DMSA | 1.18 ± 0.03 | 41 ± 0.3 | 439 ± 52 | 16.6 ± 0.6 |

# **Table S5**. Mechanical parameters of “heterogeneously dispersed nano-domains” (hDNs)-structured alloys incorporating various compositional ratio of PLLA in m-EGMA from. The concentration of DMSA in m-EGMA was fixed as 0.3 wt%.

|  | **Young’s modulus/GPa** | **Tensile strength/MPa** | **Elongation at break/%** | **Notched impact strength/kJ/m2** |
| --- | --- | --- | --- | --- |
| 90/10/0 | 1.11 ± 0.02 | 54 ± 0.3 | 102 ± 29 | 16.2 ± 0.3 |
| 89/10/1 | 1.15 ± 0.03 | 54 ± 0.4 | 371 ± 76 | 18.0 ± 1.0 |
| 87/10/3 | 1.01 ± 0.03 | 53 ± 1.8 | 575 ± 115 | 21.2 ± 0.8 |
| 85/10/5 | 1.03 ± 0.06 | 50 ± 1.0 | 533 ± 20 | 25.1 ± 0.5 |
| 80/10/10 | 1.19 ± 0.02 | 48 ± 0.4 | 489 ± 114 | 24.0 ± 1.5 |
| 75/10/15 | 1.42 ± 0.03 | 49 ± 0.4 | 539 ± 37 | 22.7 ± 0.6 |
| 70/10/20 | 1.36 ± 0.02 | 50 ± 1.0 | 429 ± 173 | 41.5 ± 1.0 |
| 65/10/25 | 1.52 ± 0.07 | 47 ± 0.4 | 530 ± 113 | 43.3 ± 1.3 |
| 60/10/30 | 1.48 ± 0.02 | 47 ± 1.0 | 150 ± 24 | 14.1 ± 0.5 |

# **Table S6**. Mechanical parameters of “heterogeneously dispersed nano-domains” (hDNs)-structured alloys as a function of EGMA loadings in m-EGMA.

|  | **Young’s modulus/GPa** | **Tensile strength/MPa** | **Elongation at break/%** | **Notched impact strength/kJ/m2** |
| --- | --- | --- | --- | --- |
| 70/0/20 | 1.59 ± 0.06 | 62 ± 0.7 | 68 ± 9 | 8.7 ± 0.8 |
| 70/5/20 | 1.44 ± 0.05 | 54 ± 0.9 | 280 ± 113 | 16.8 ± 0.5 |
| 70/10/20 | 1.36 ± 0.02 | 50 ± 1.0 | 429 ± 173 | 41.5 ± 1.0 |
| 70/15/20 | 1.13 ± 0.04 | 44 ± 0.8 | 620 ± 153 | 52.9 ± 3.1 |
